# Supplementary material
Source: PubMed Central journal article supplement (PMC4034576)
Supplement: NIHMS580392-supplement-Supp_Fig_S1-S8.pdf [file NIHMS580392-supplement-Supp_Fig_S1-S8.pdf]

# Supplementary Figure 1

## Anti-Fn (Whole Molecule) (Ex.#2)

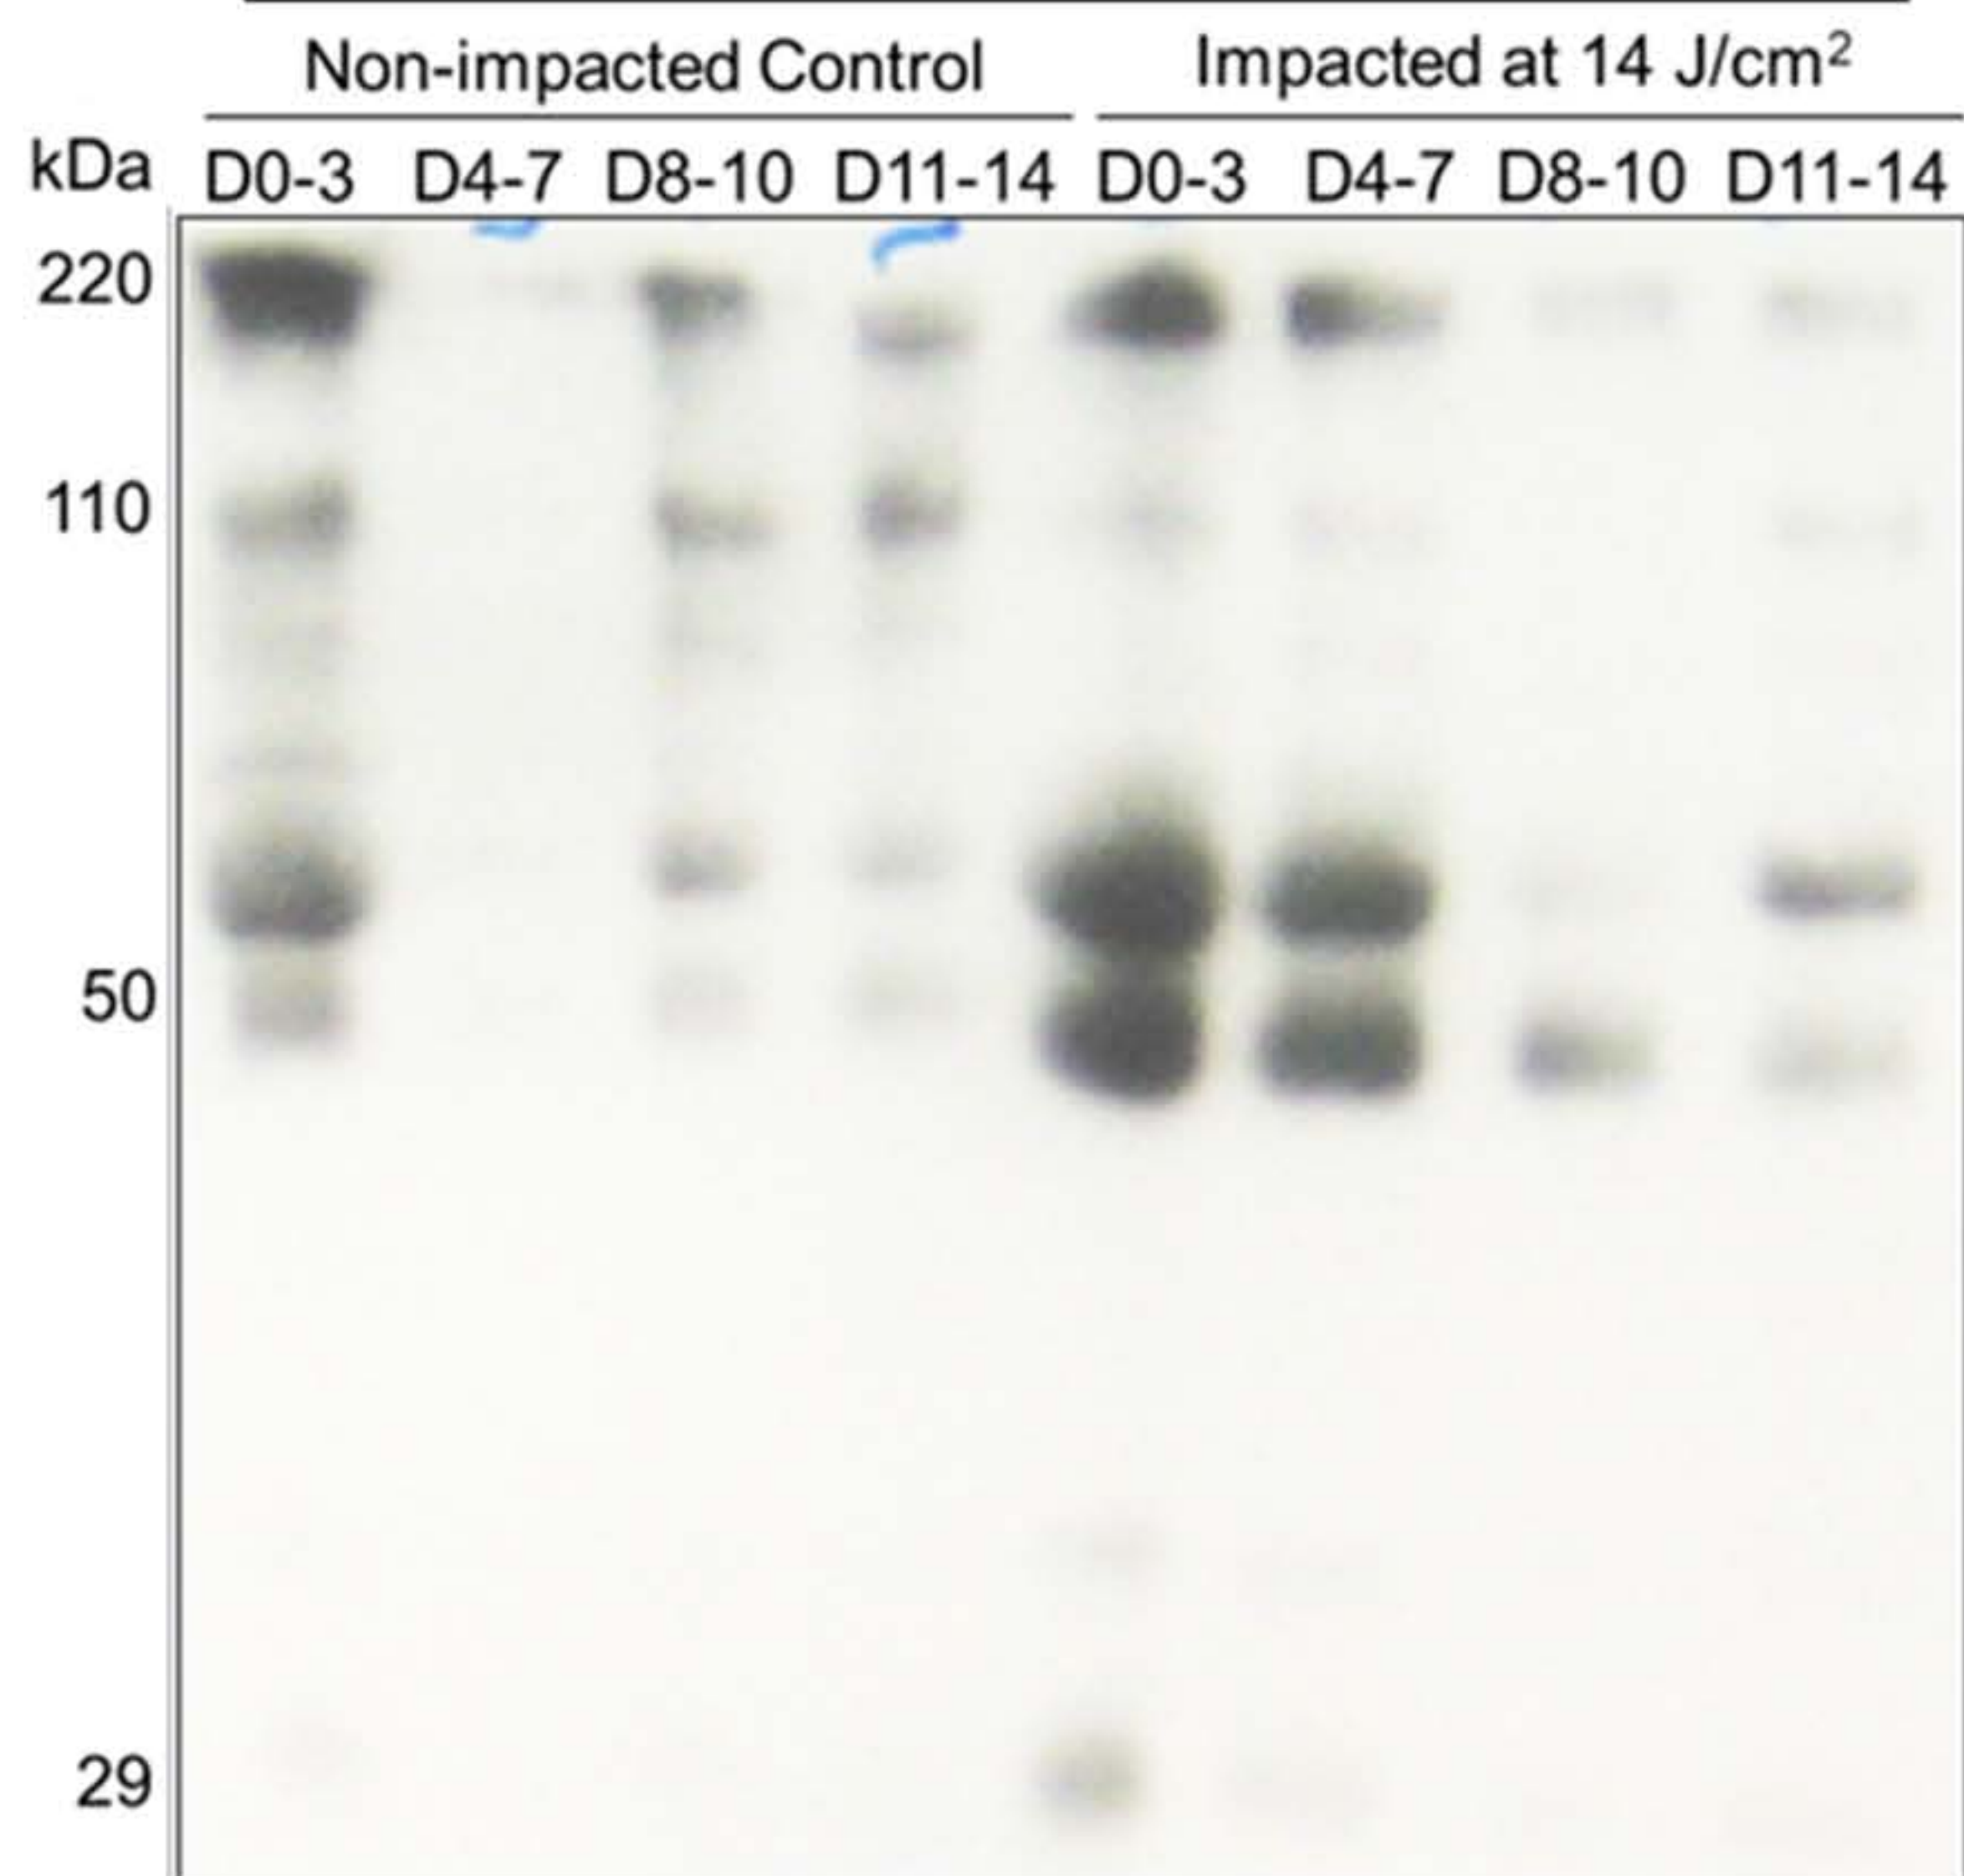

## Anti-Fn (N-terminus) (Ex.#2)

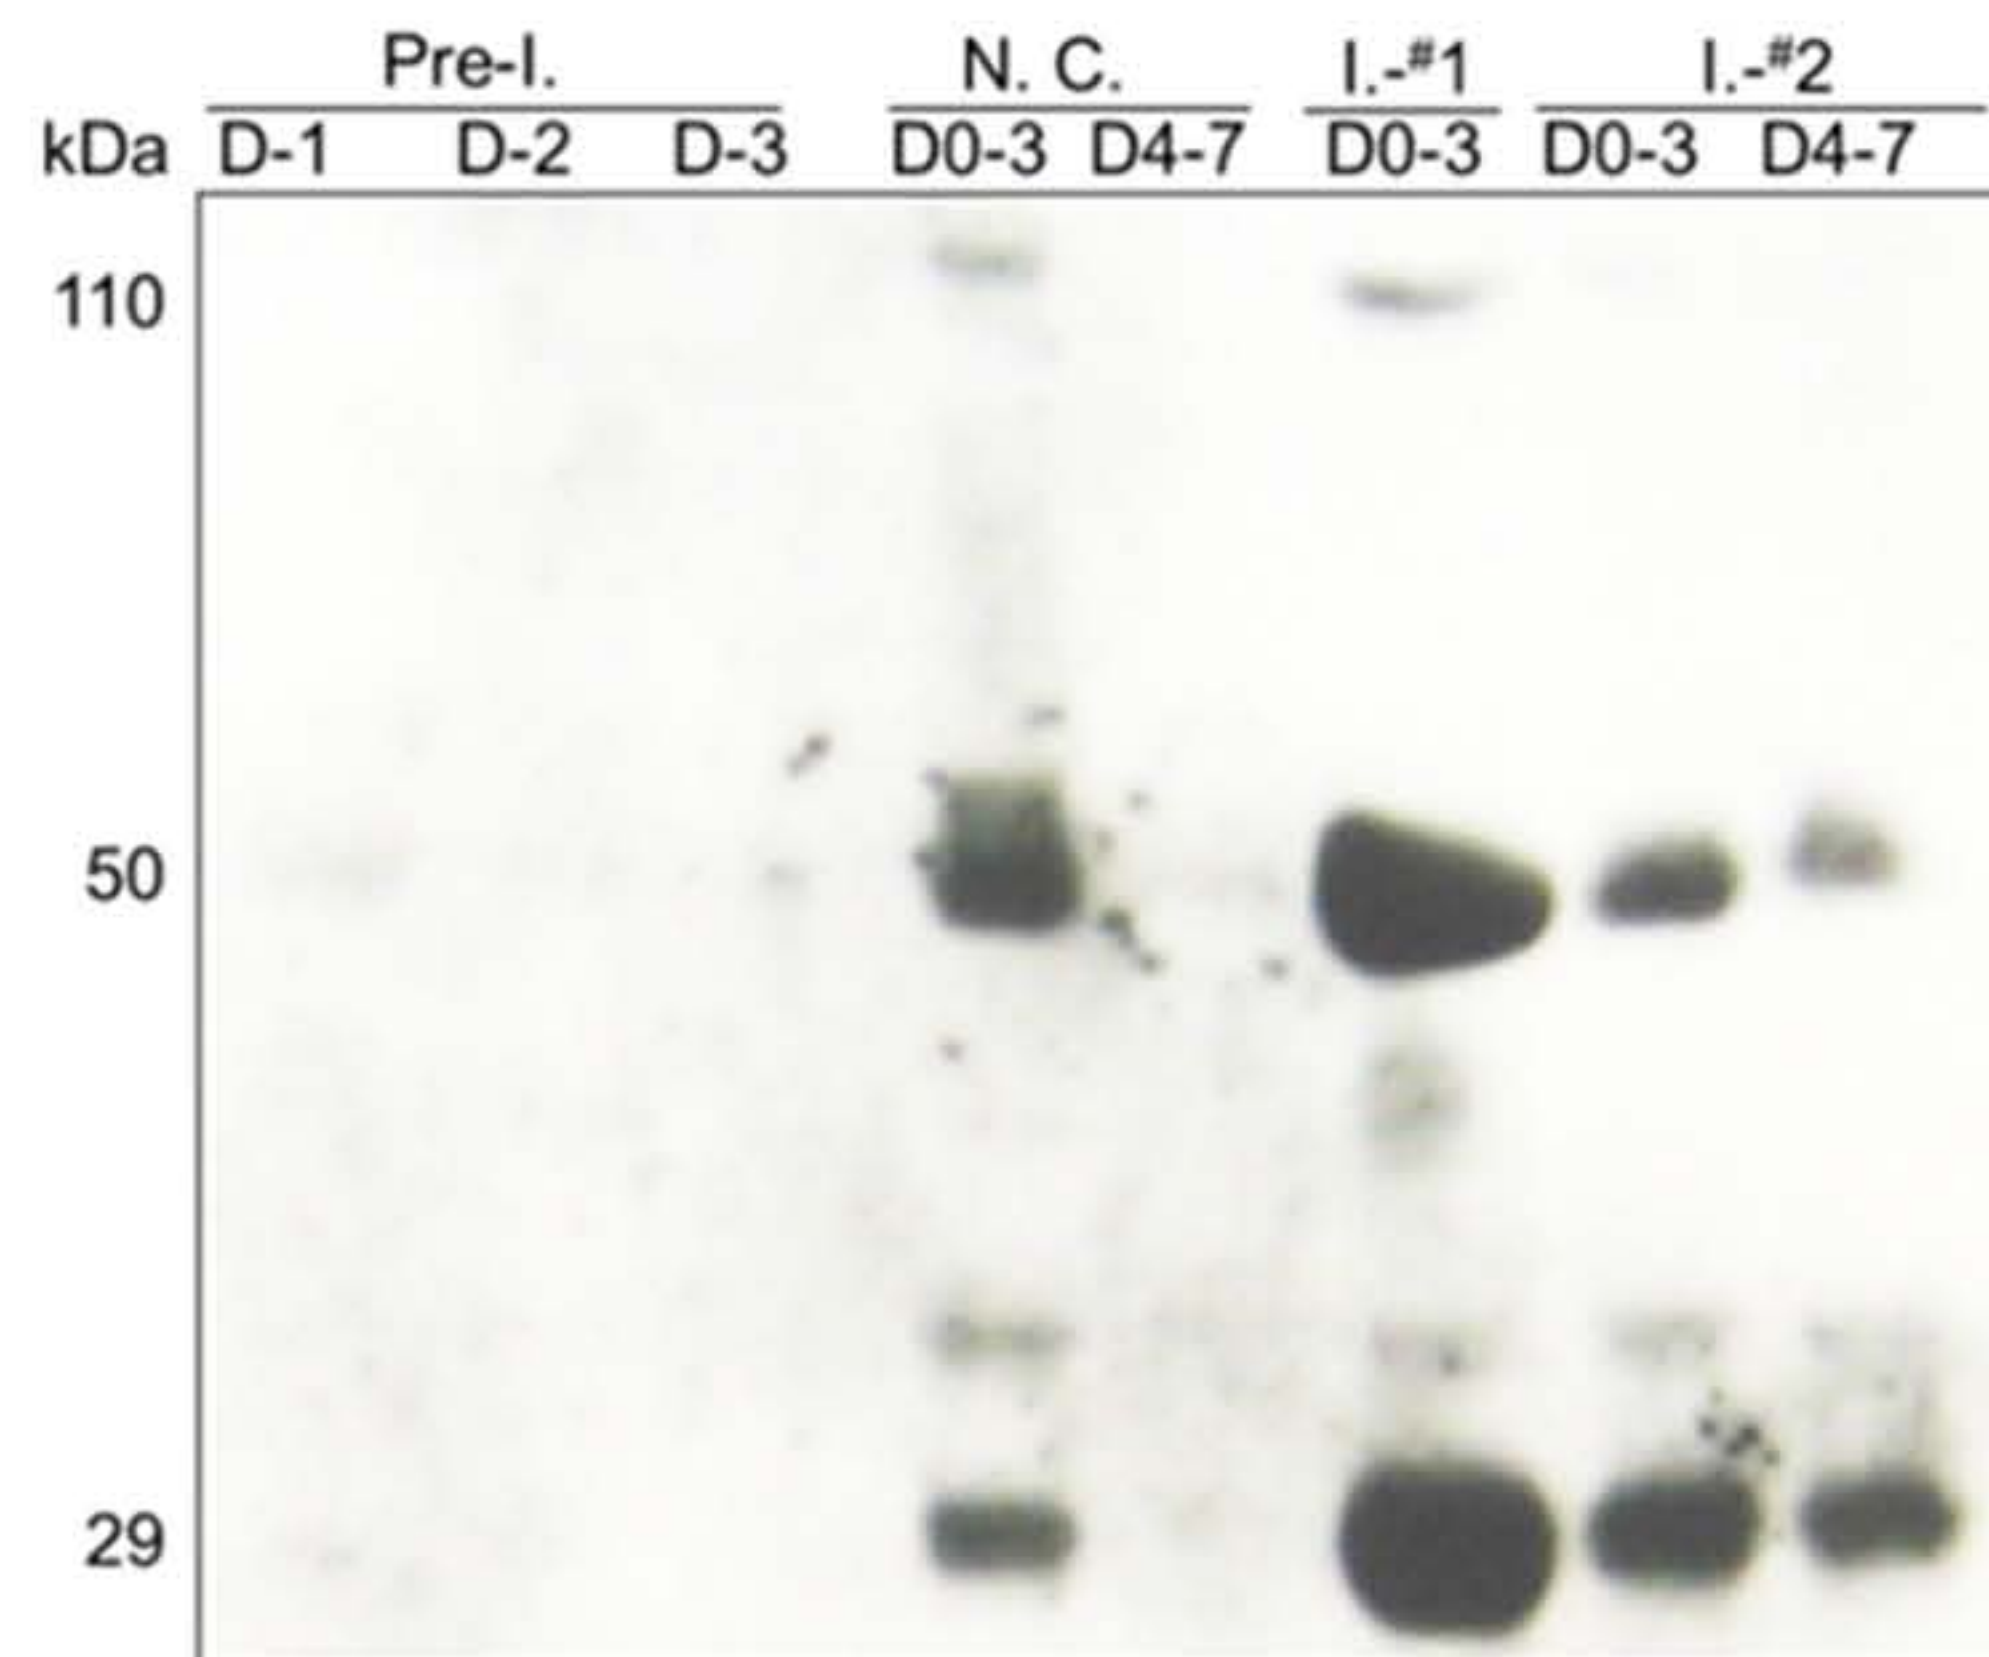

## Anti-Fn (N-terminus) (Ex.#3)

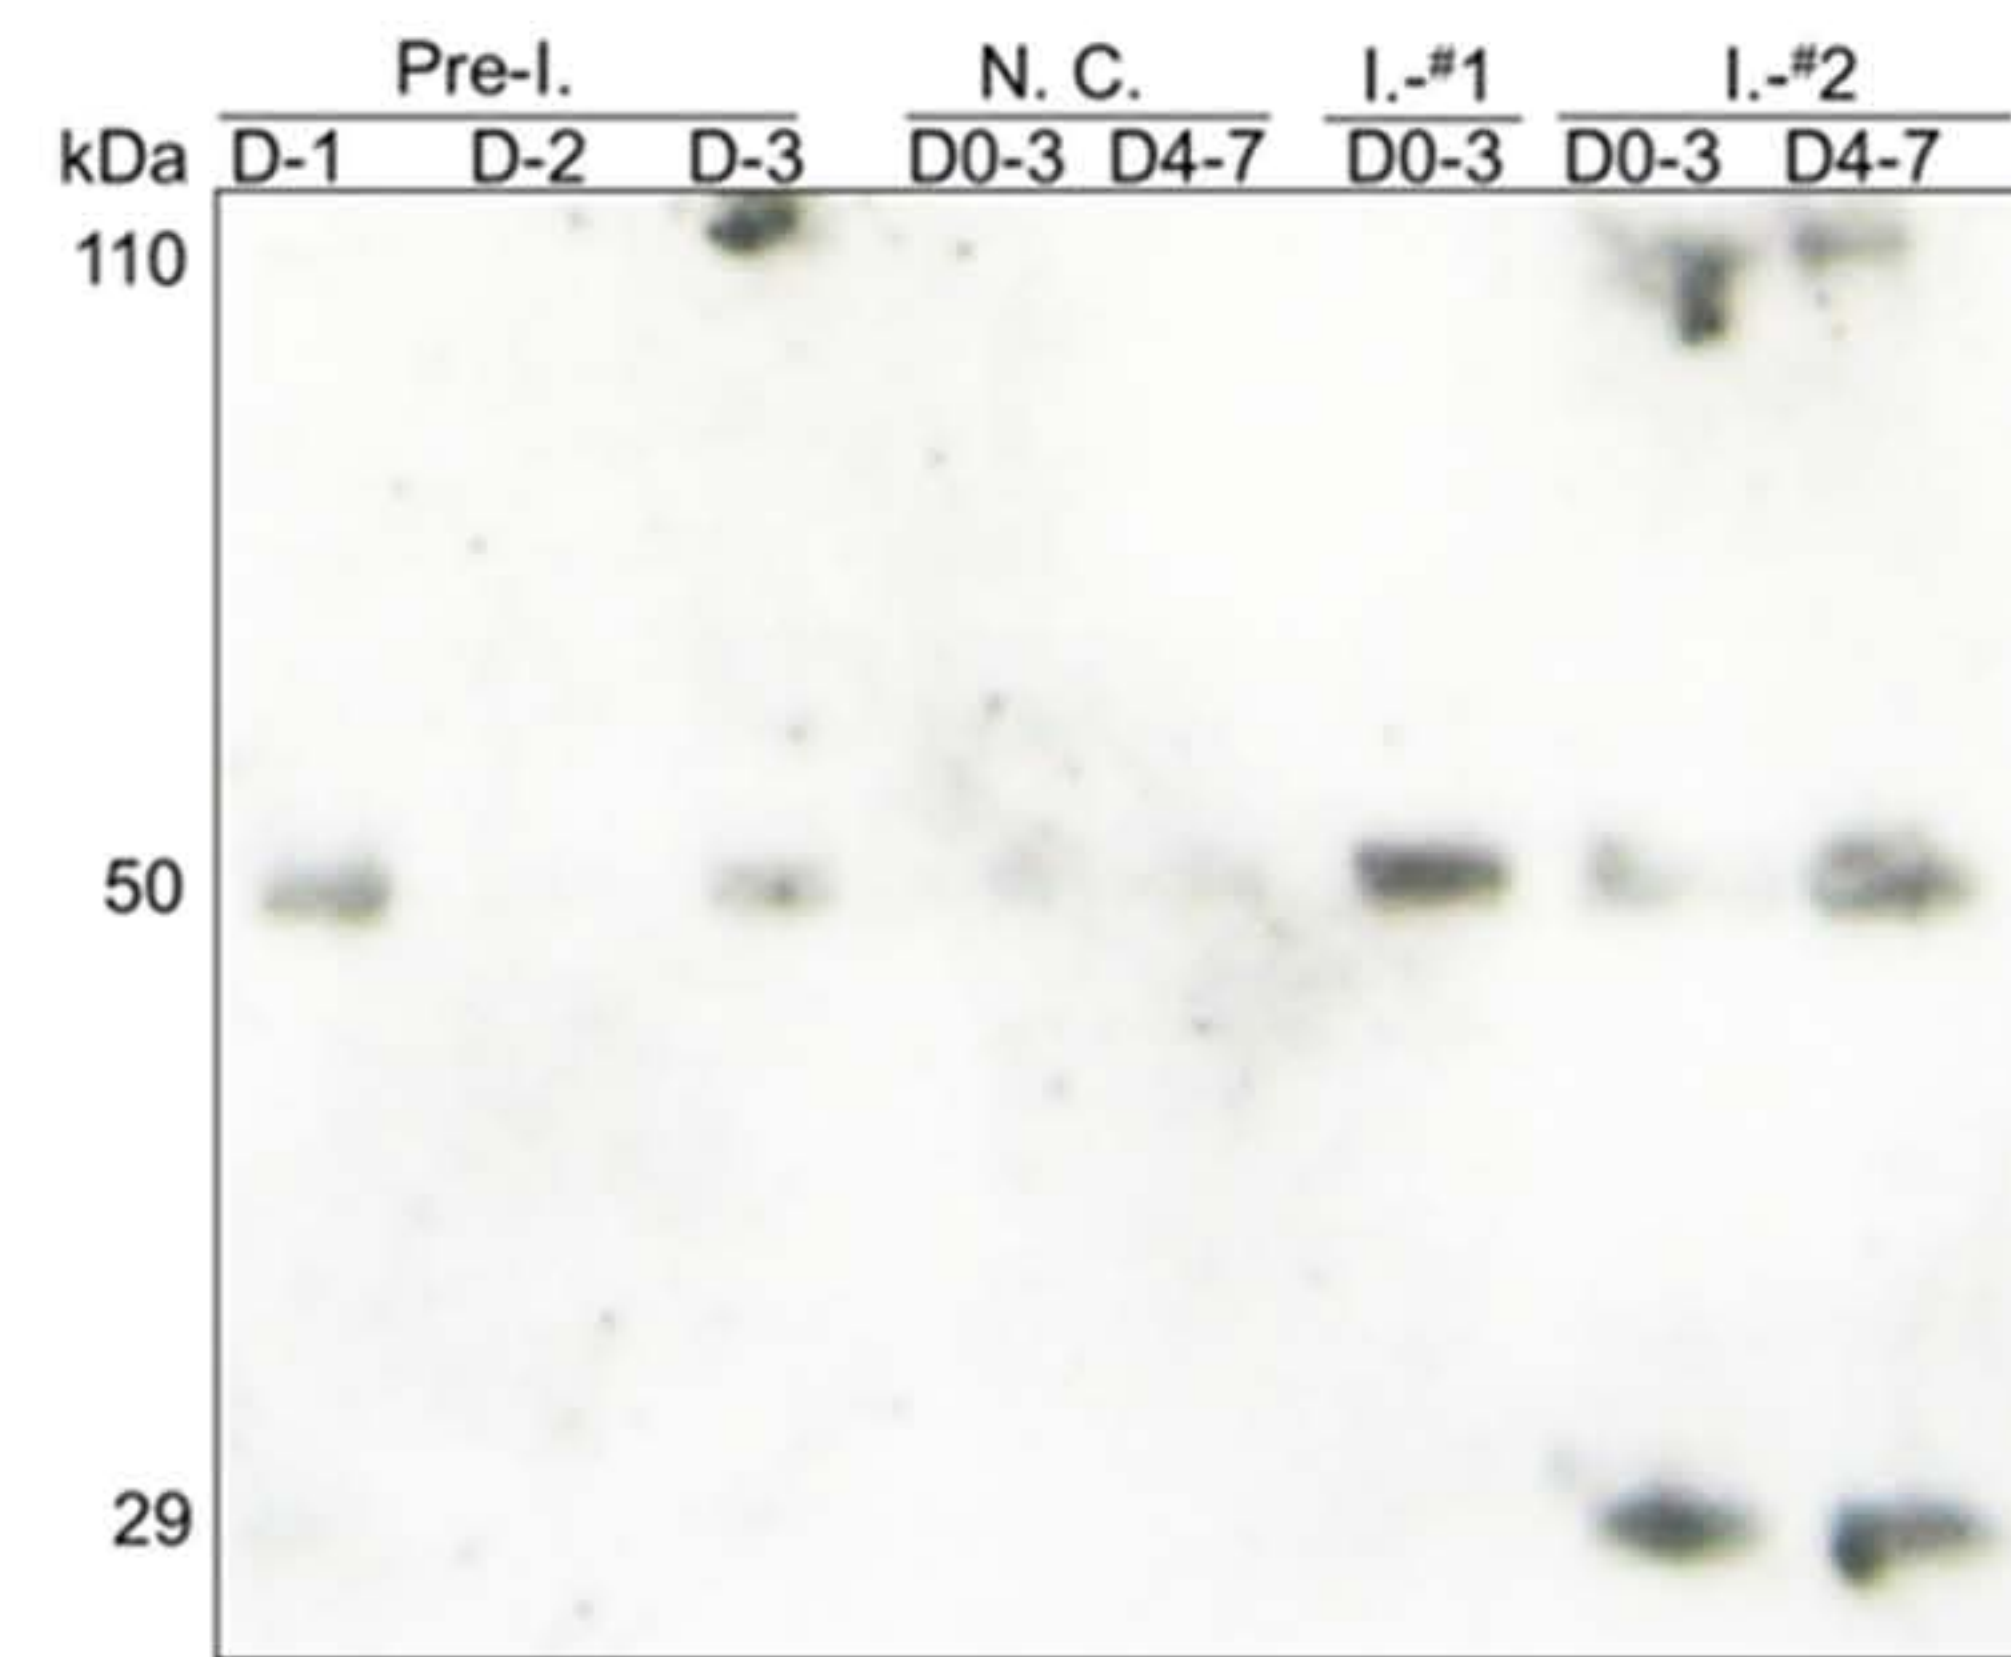

## Anti-Fn (C-terminus) (Ex.#2)

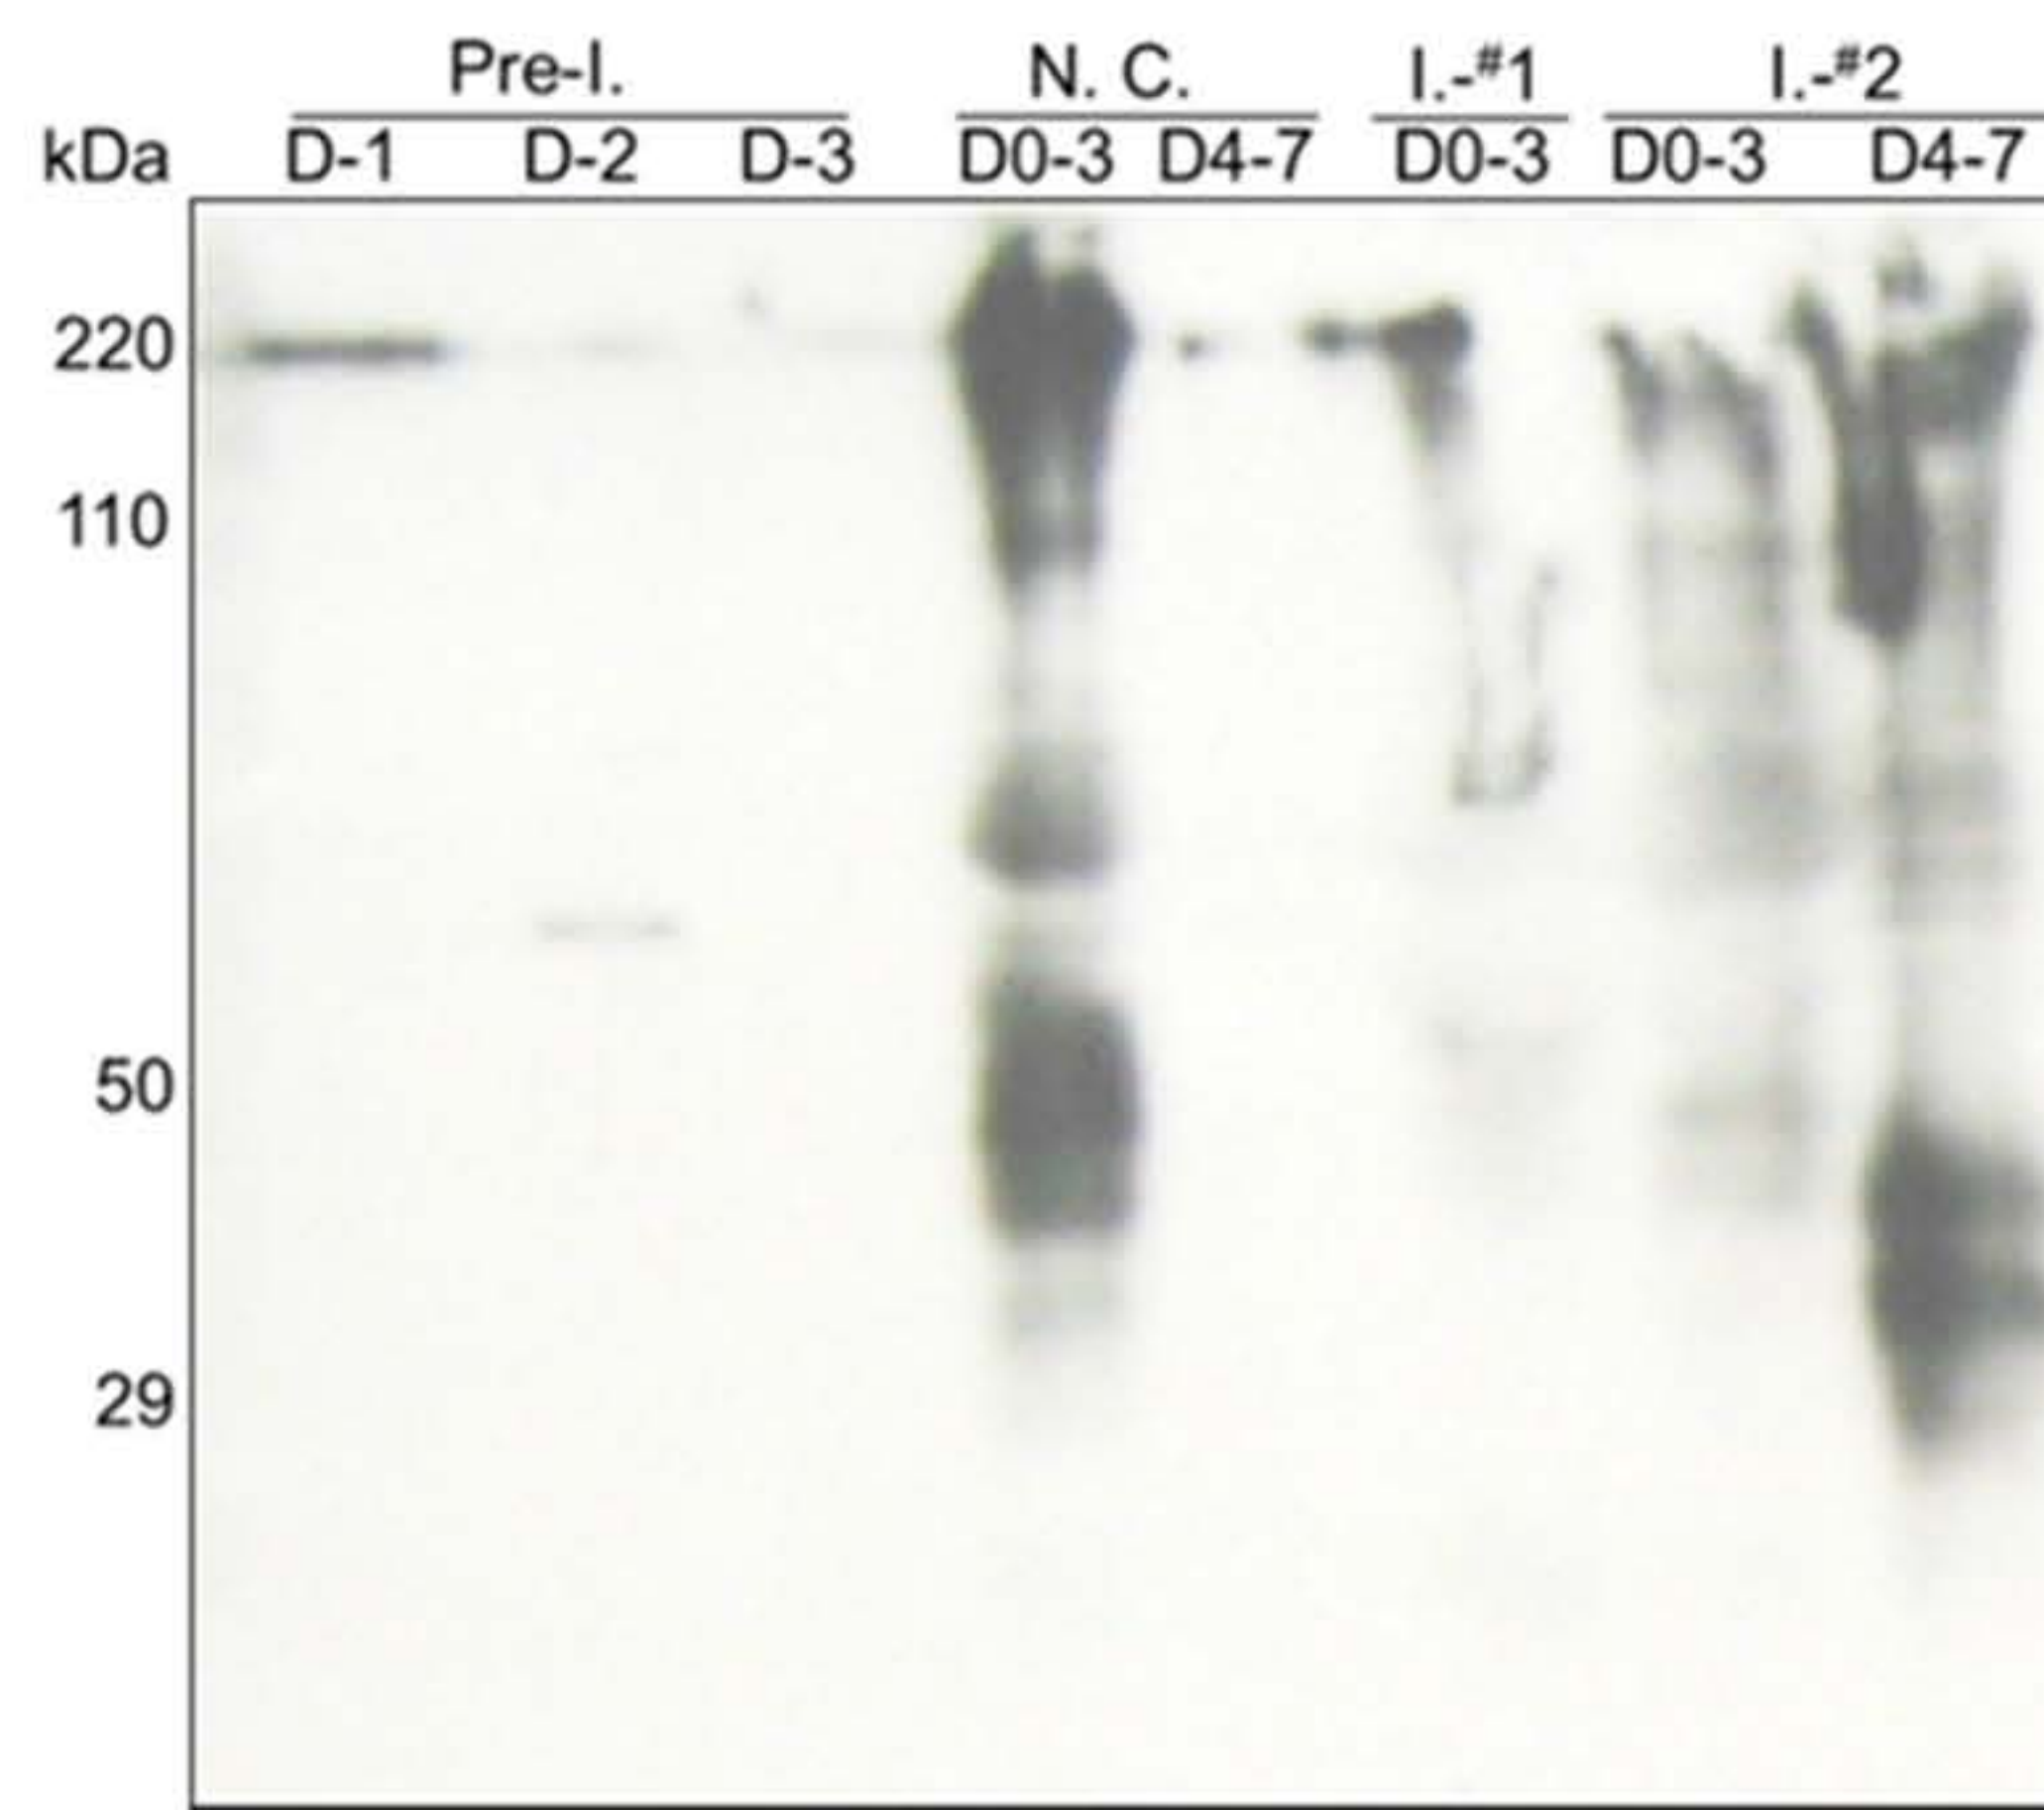

## Anti-Fn (C-terminus) (Ex.#3)

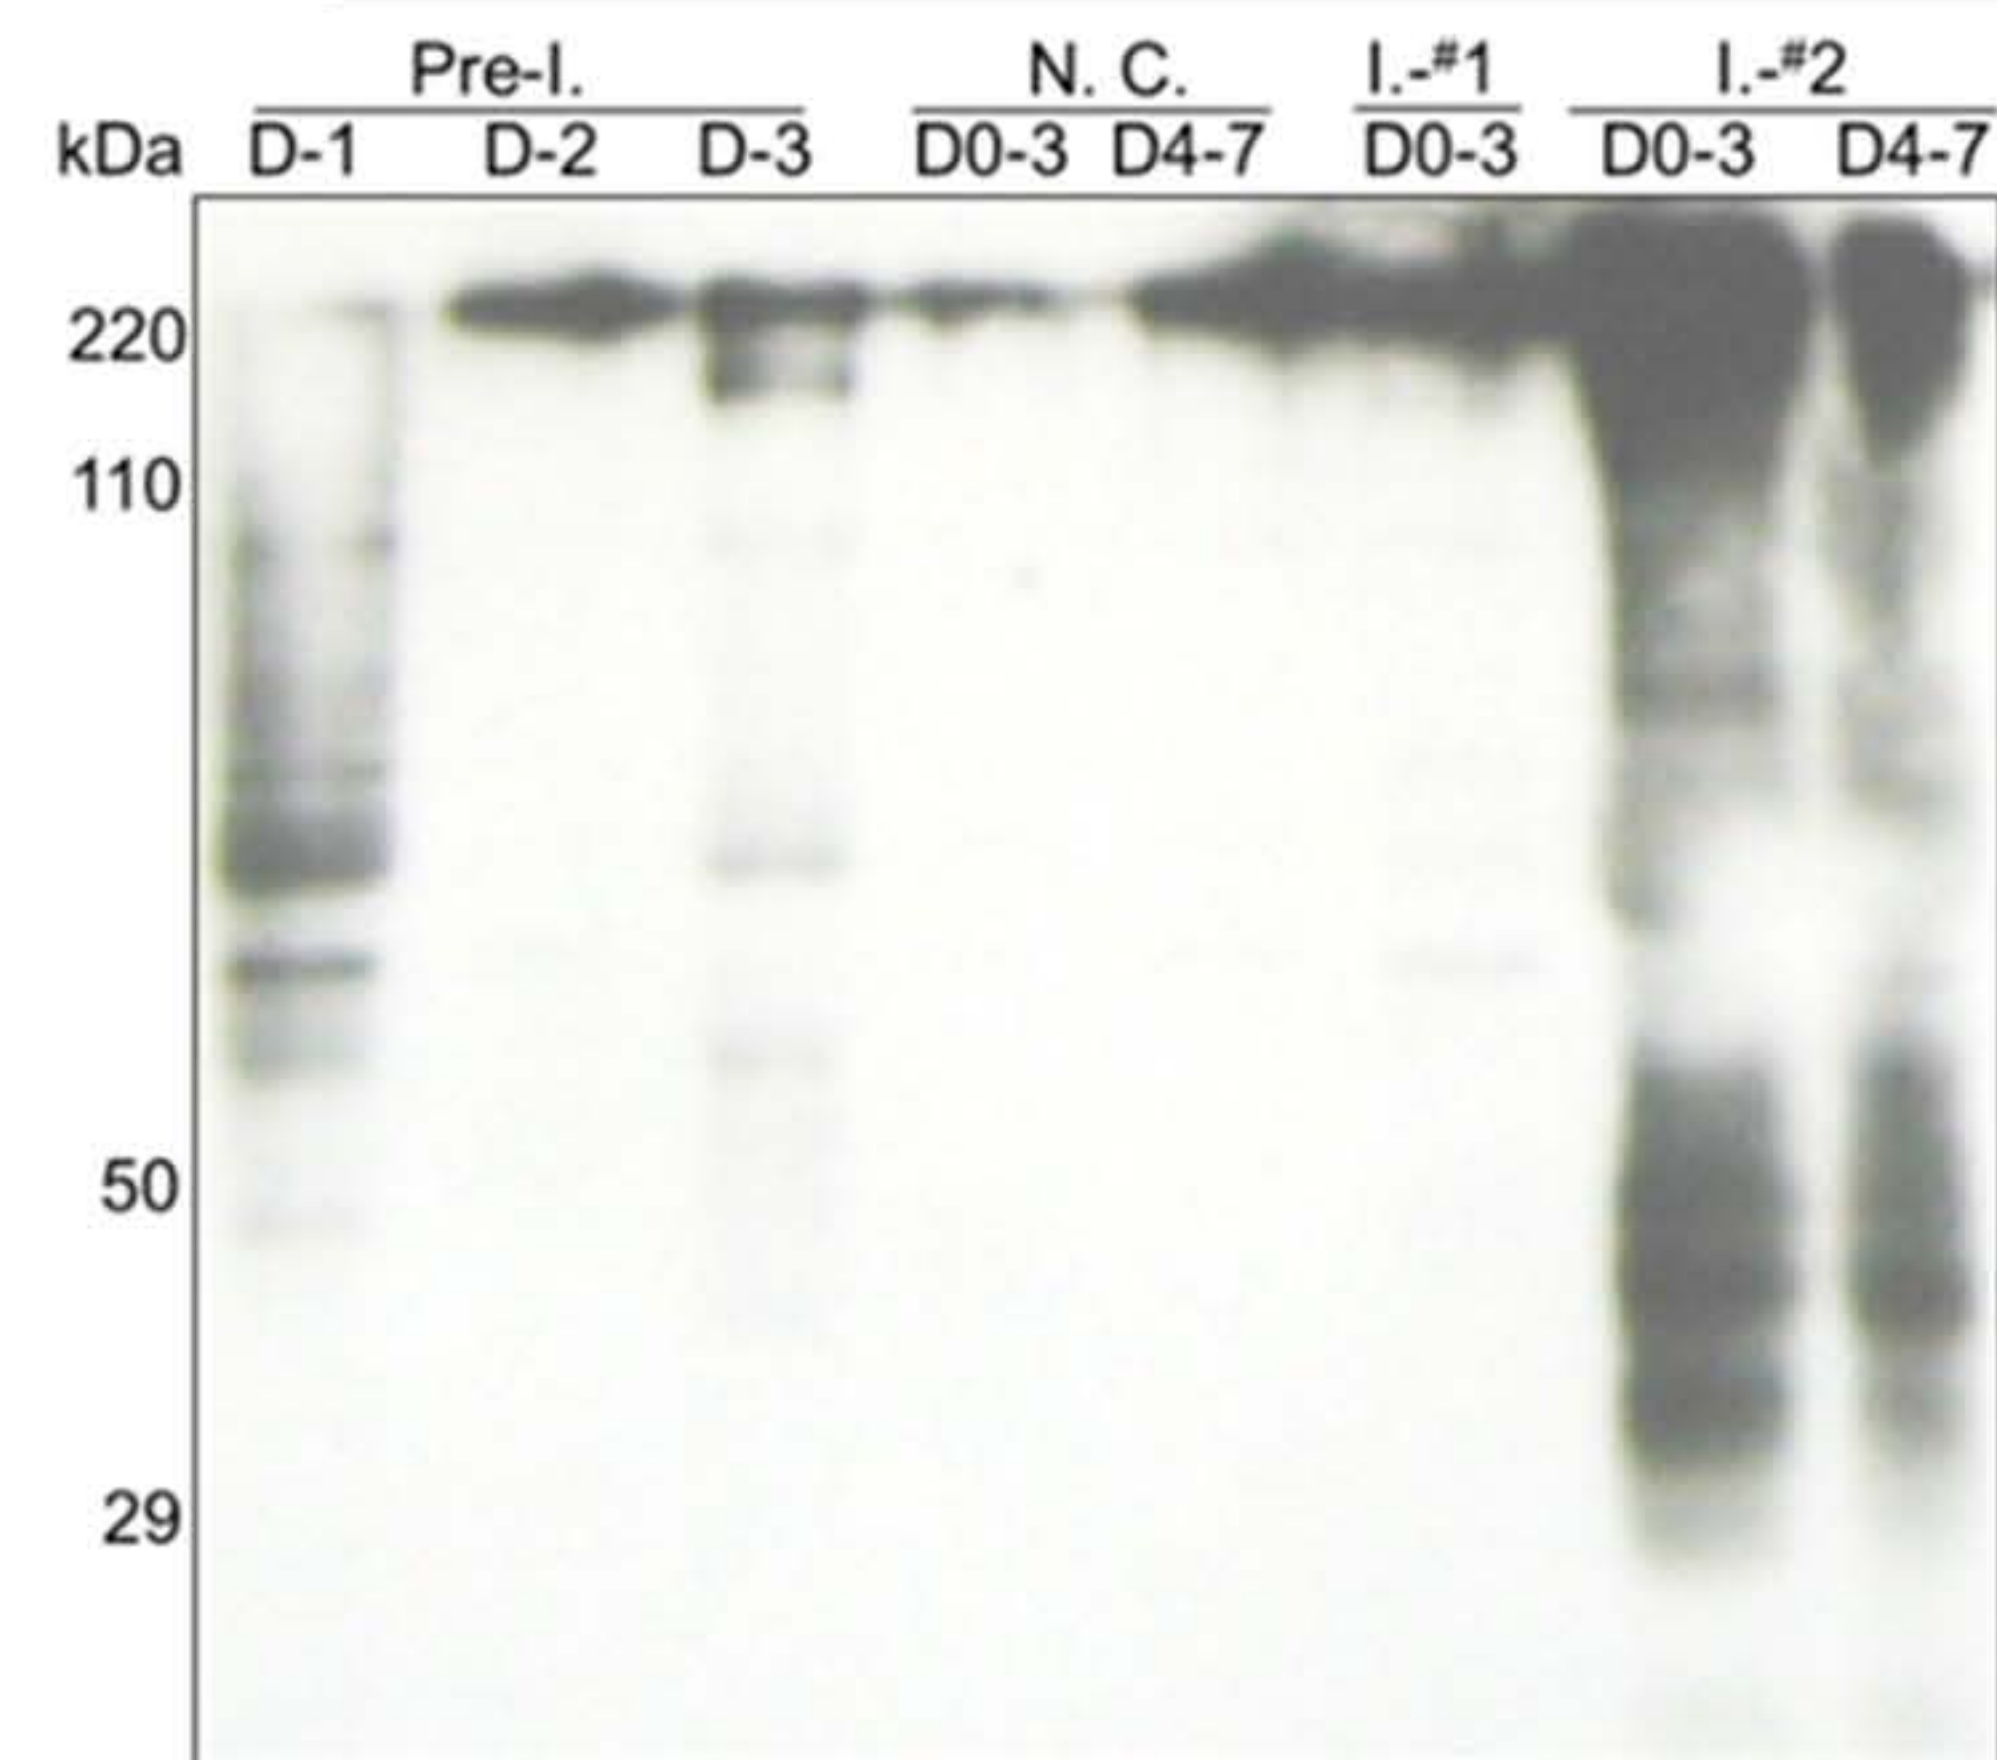



# Supplementary Figure 2

## ADAMTS-5

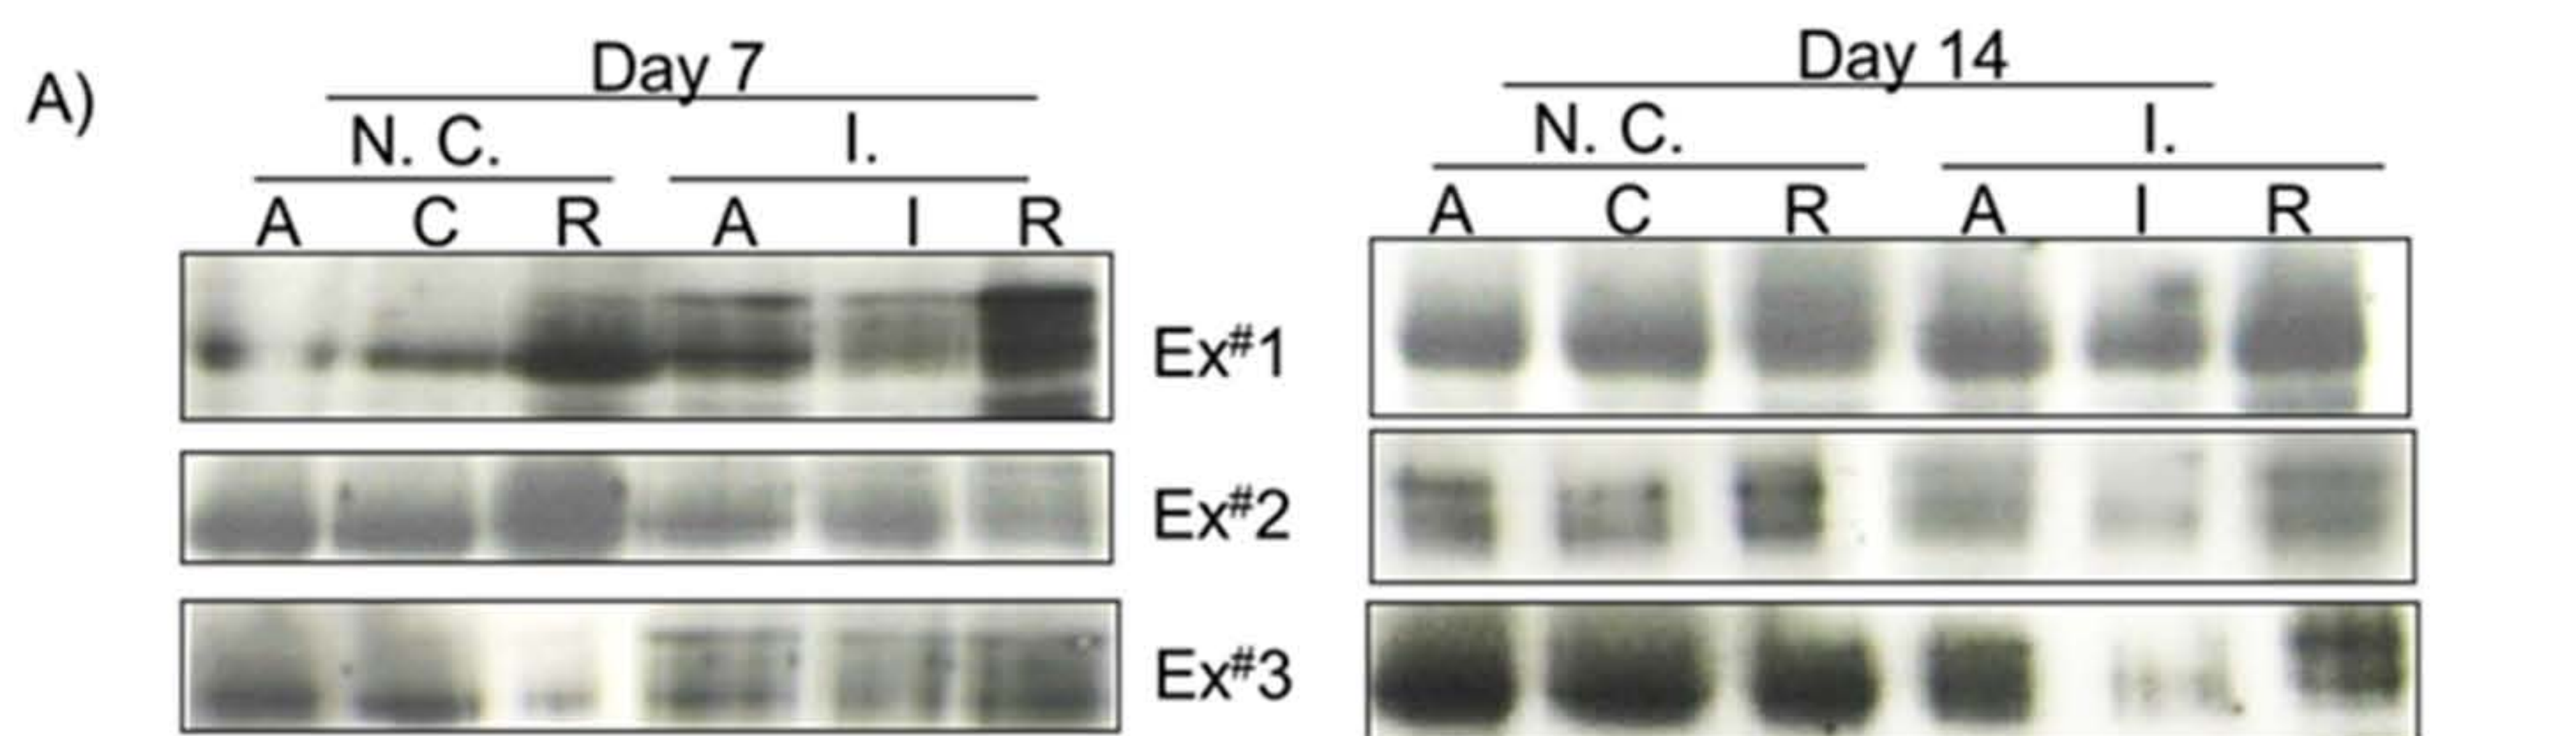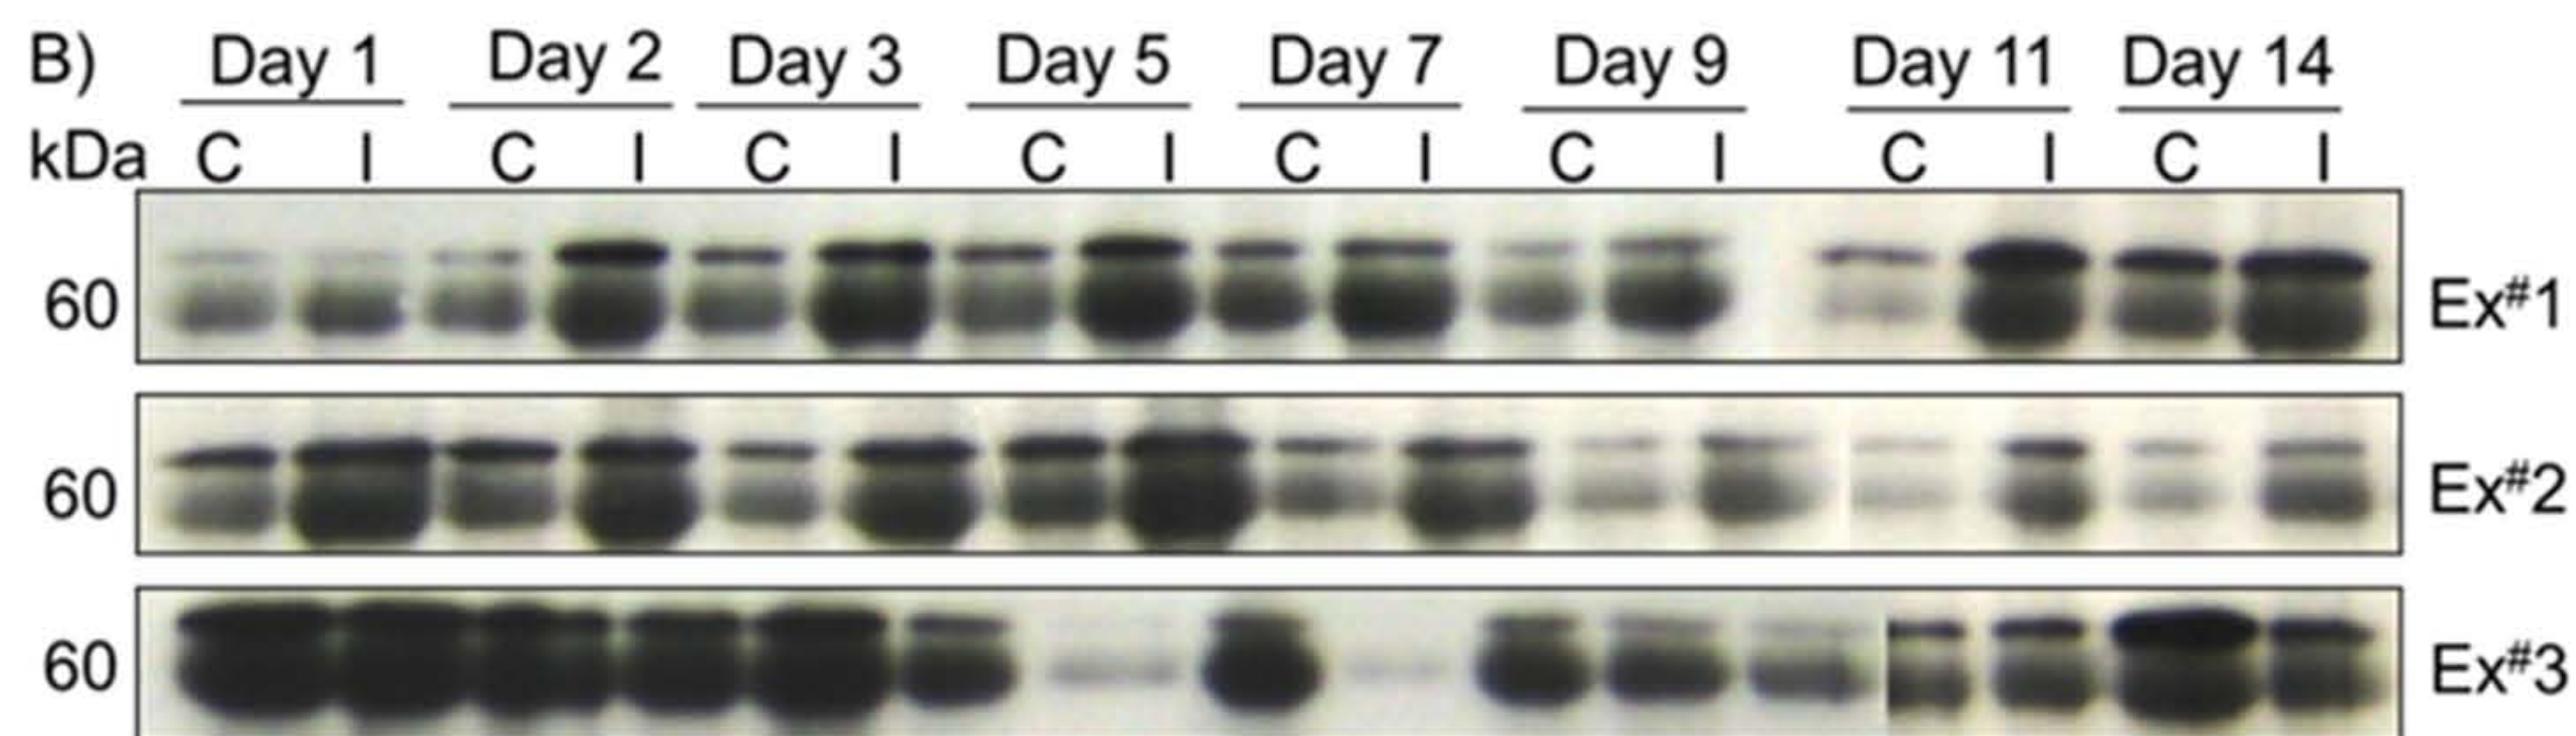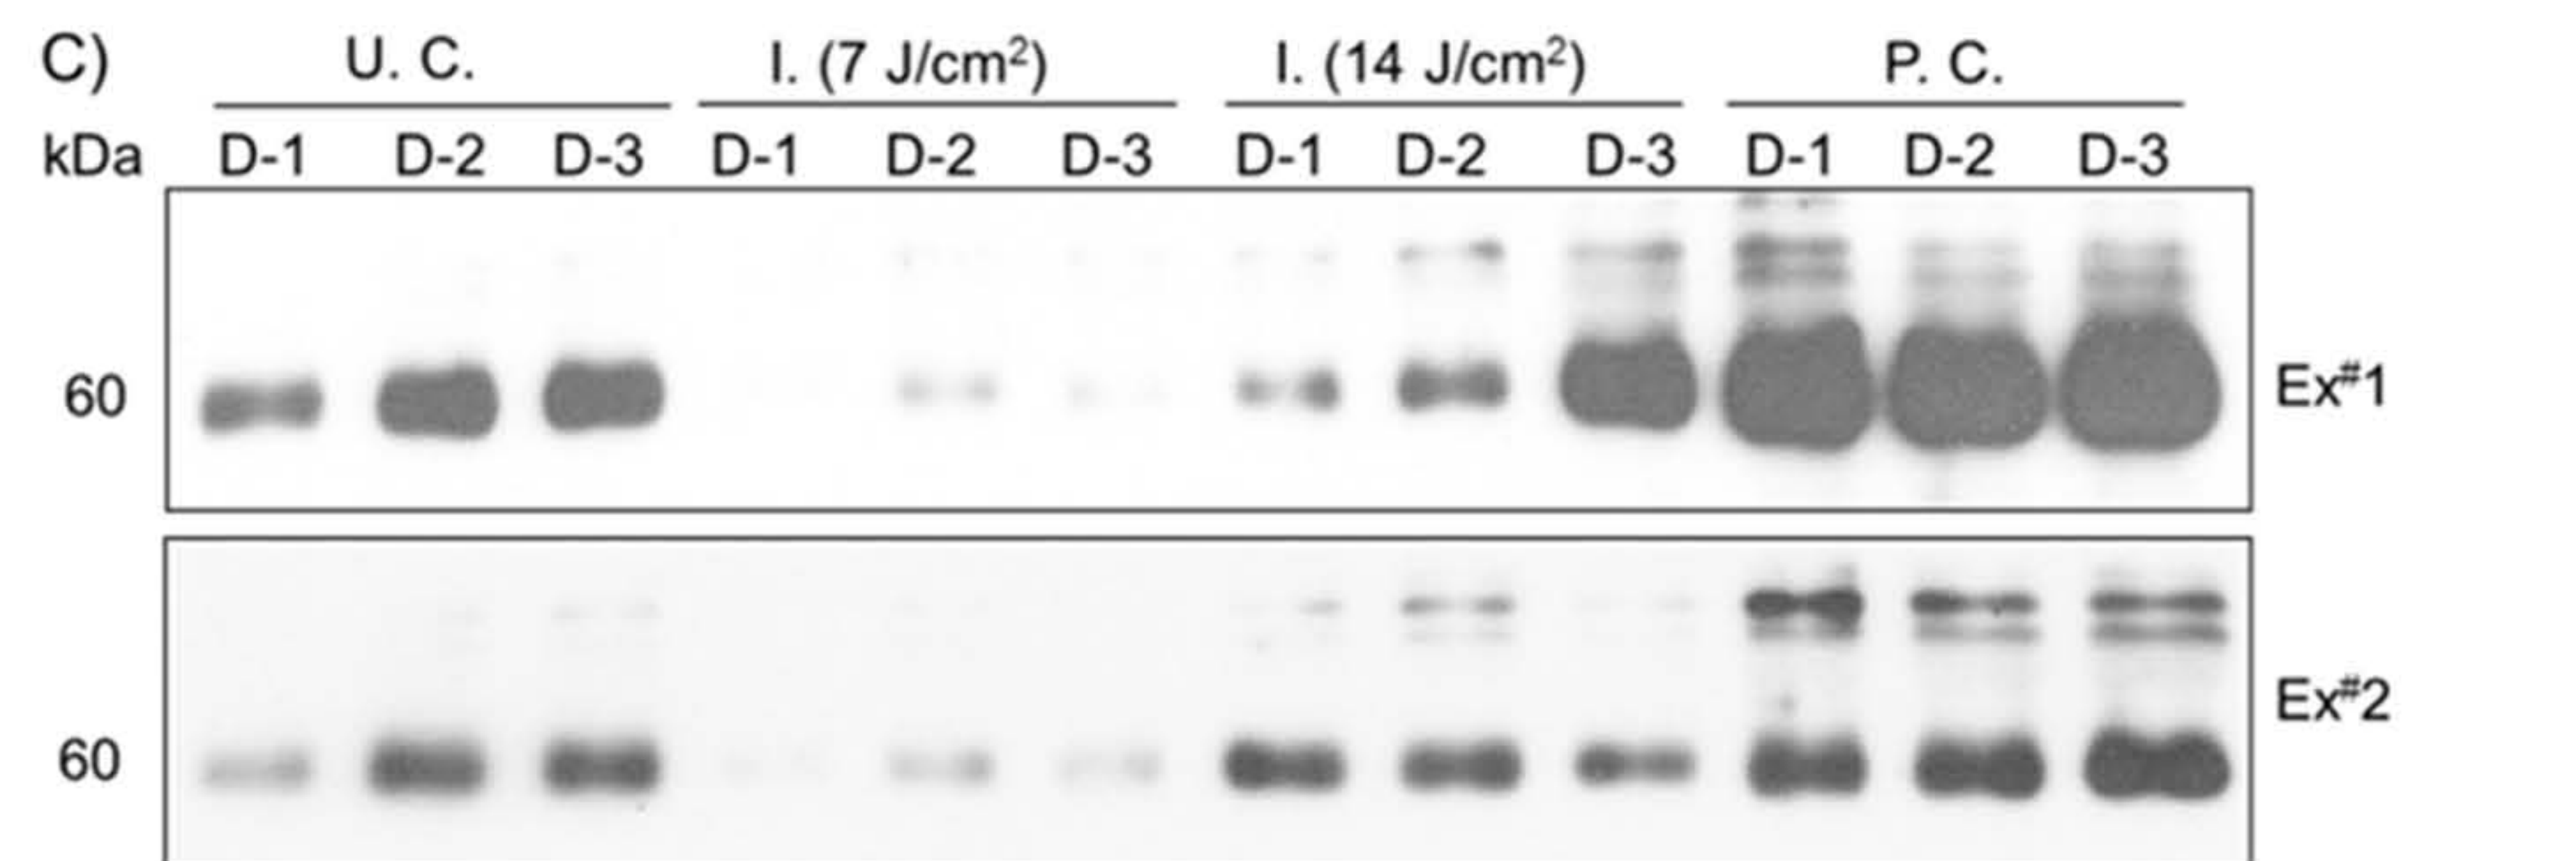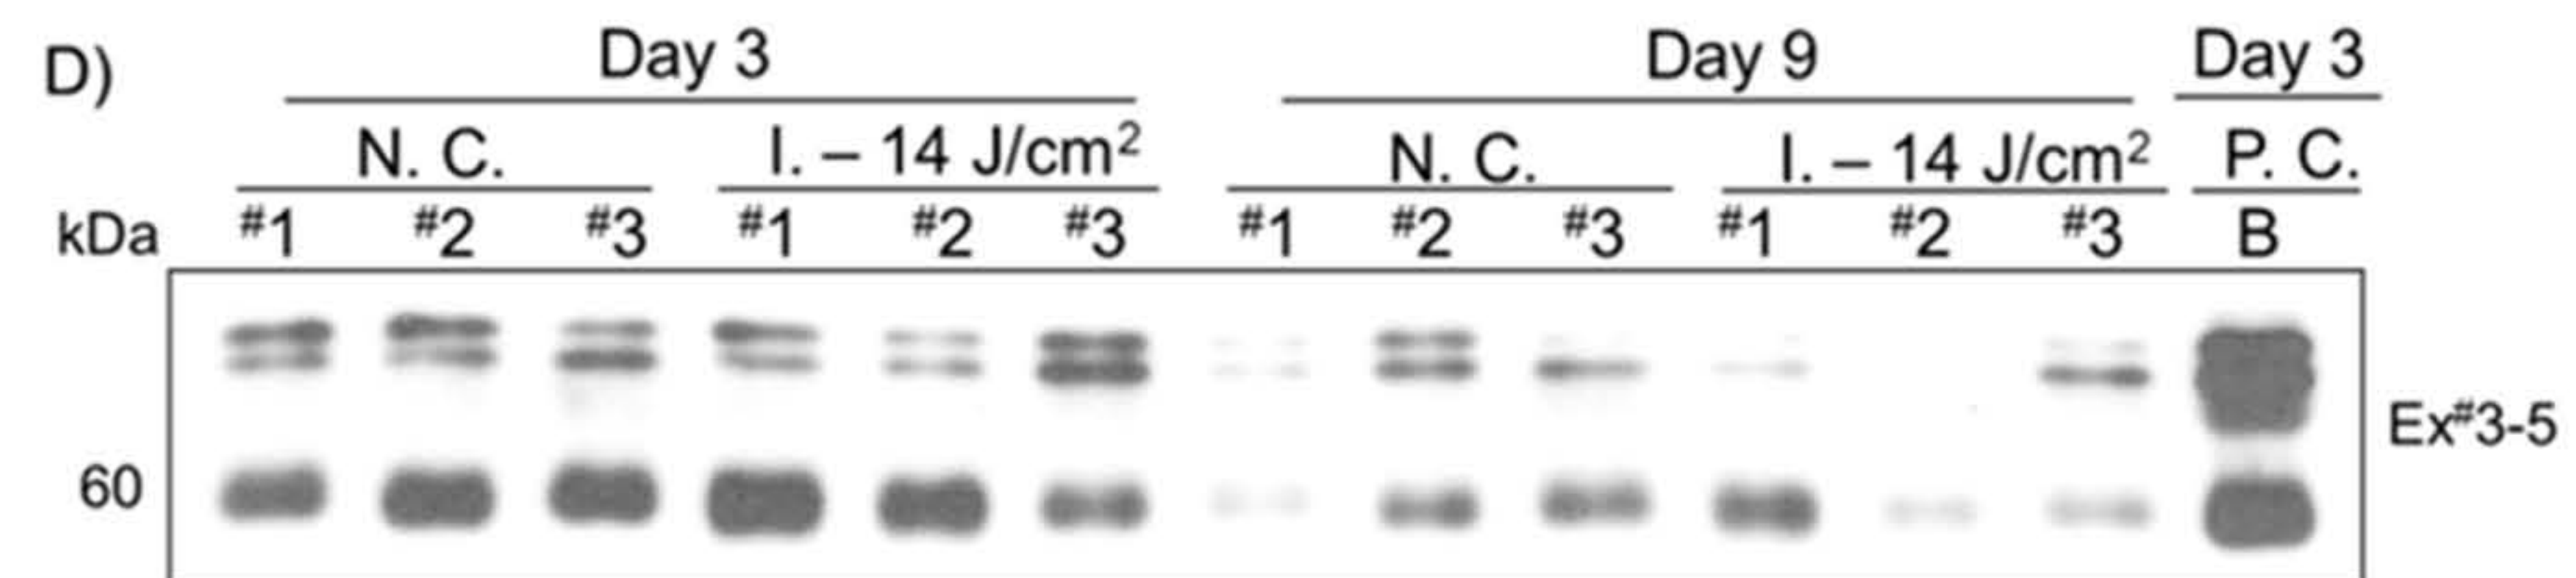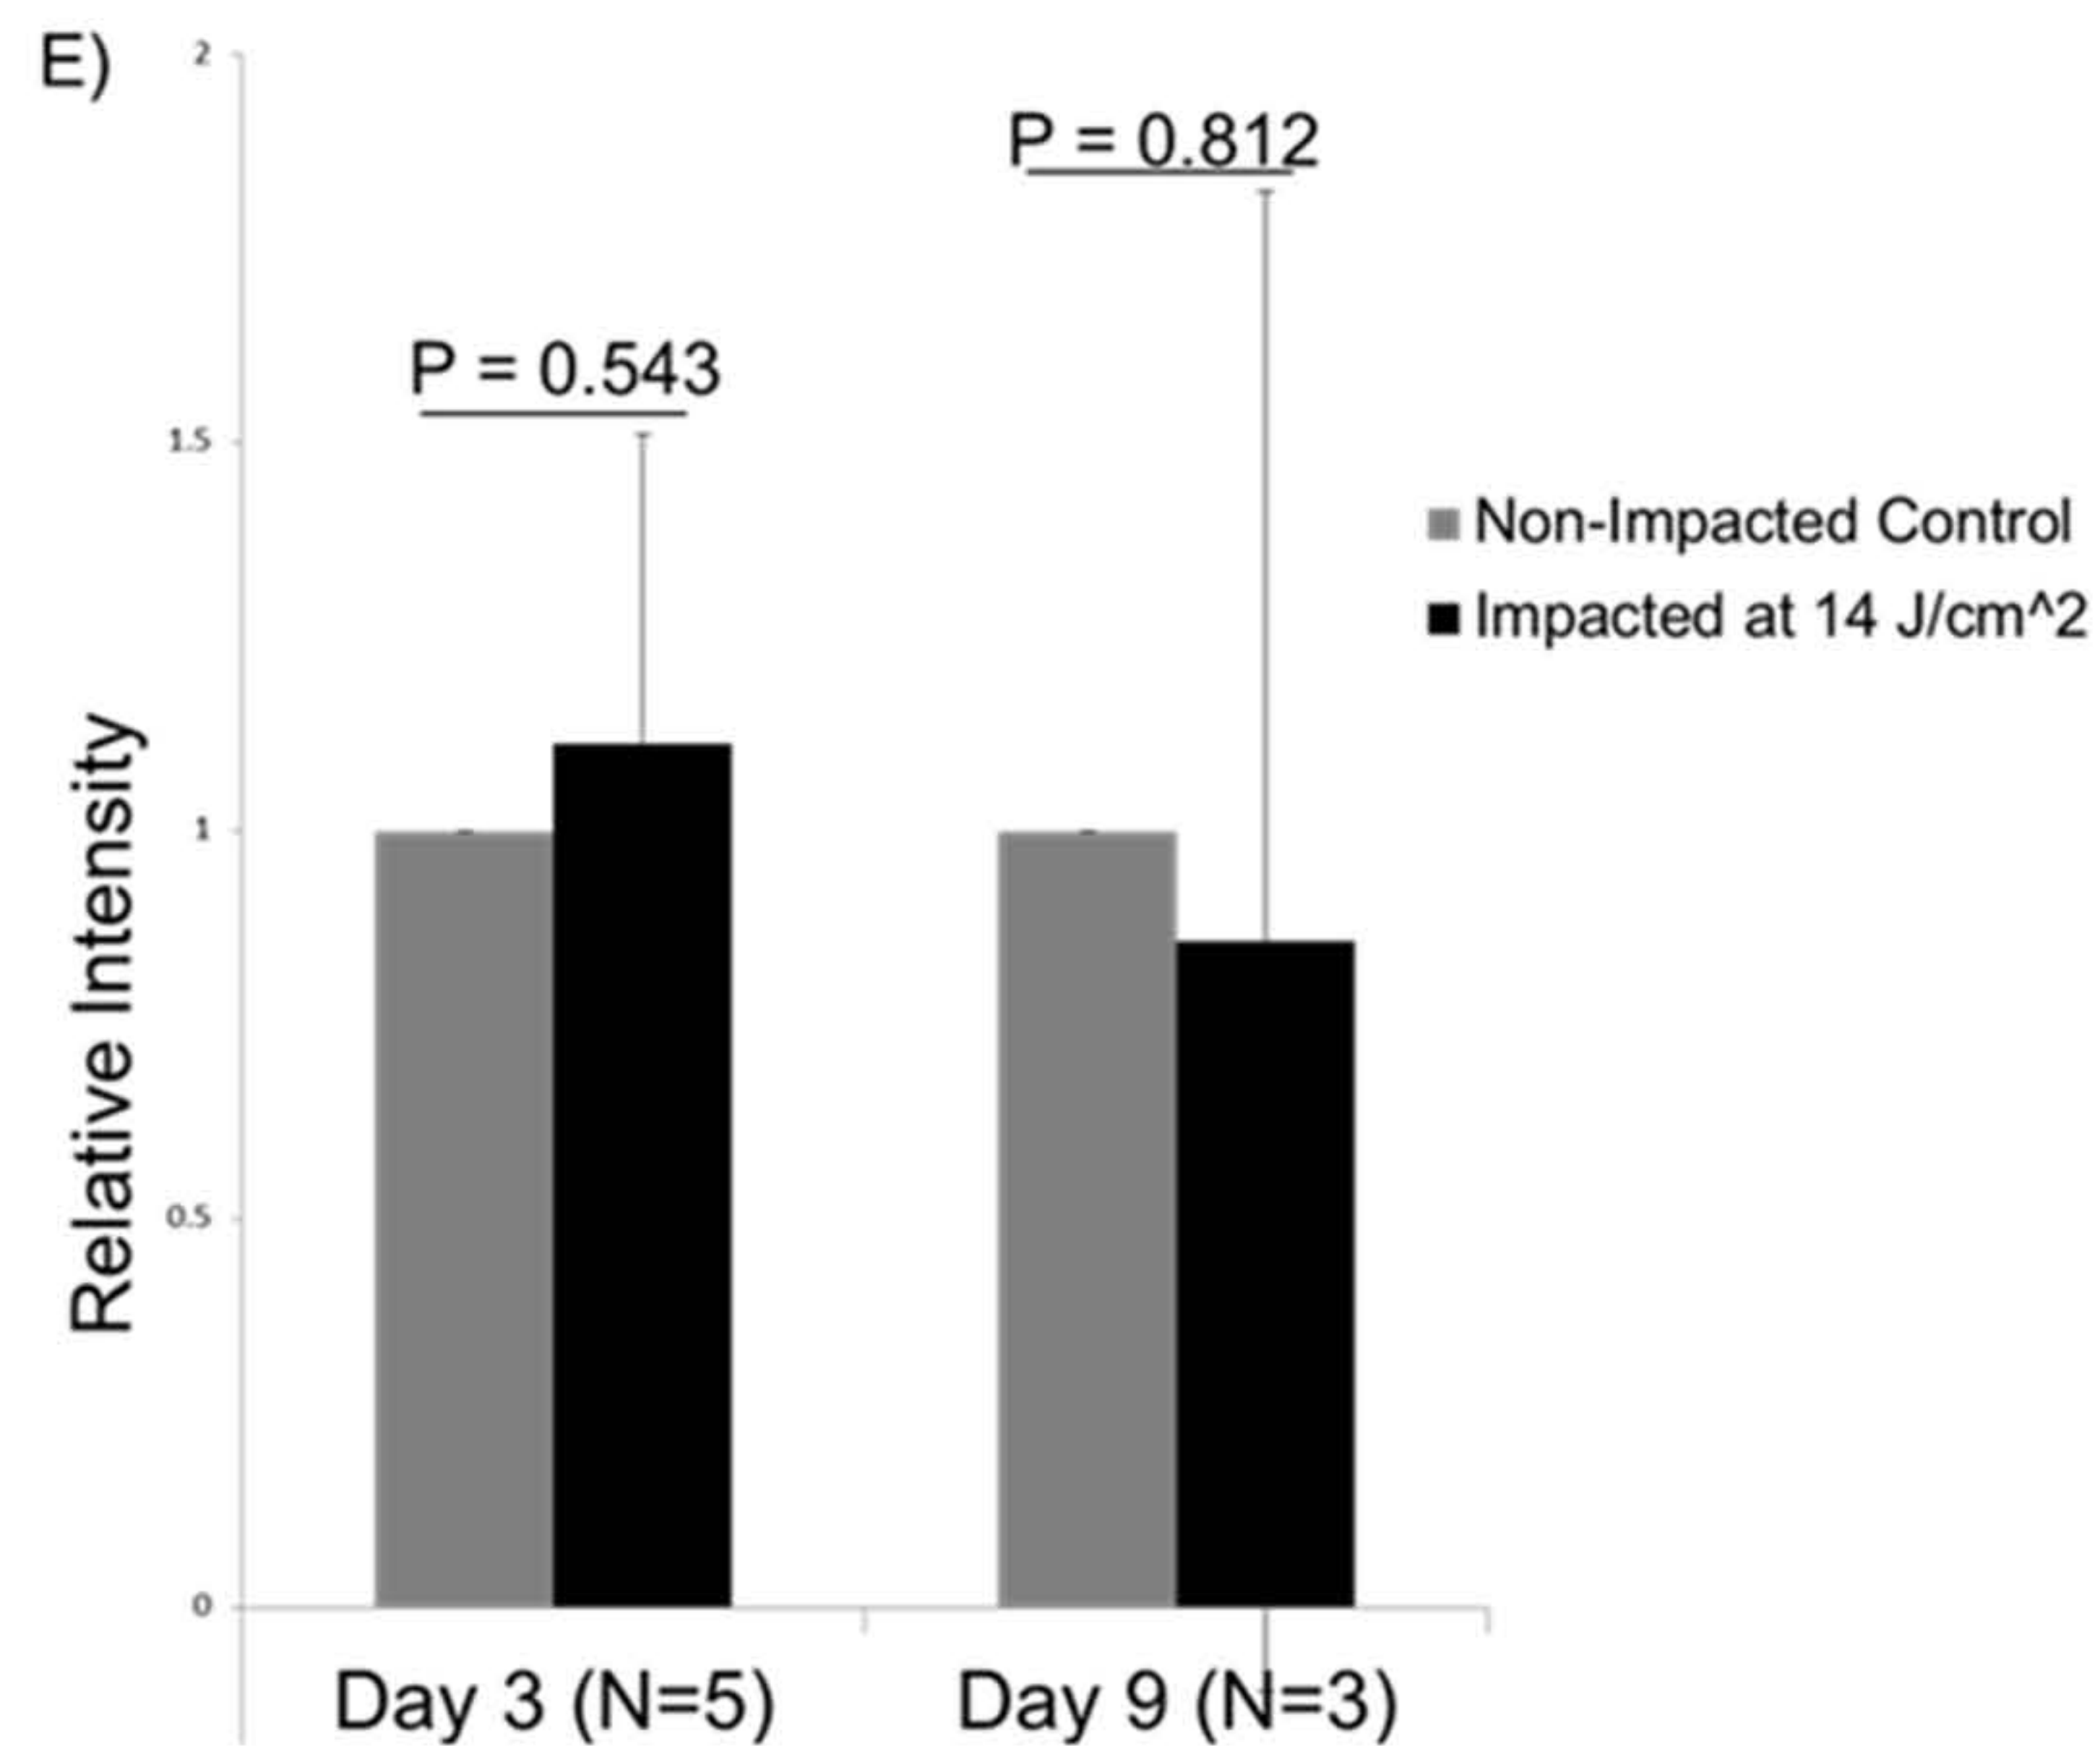



# Supplementary Figure 3

## MMP-13

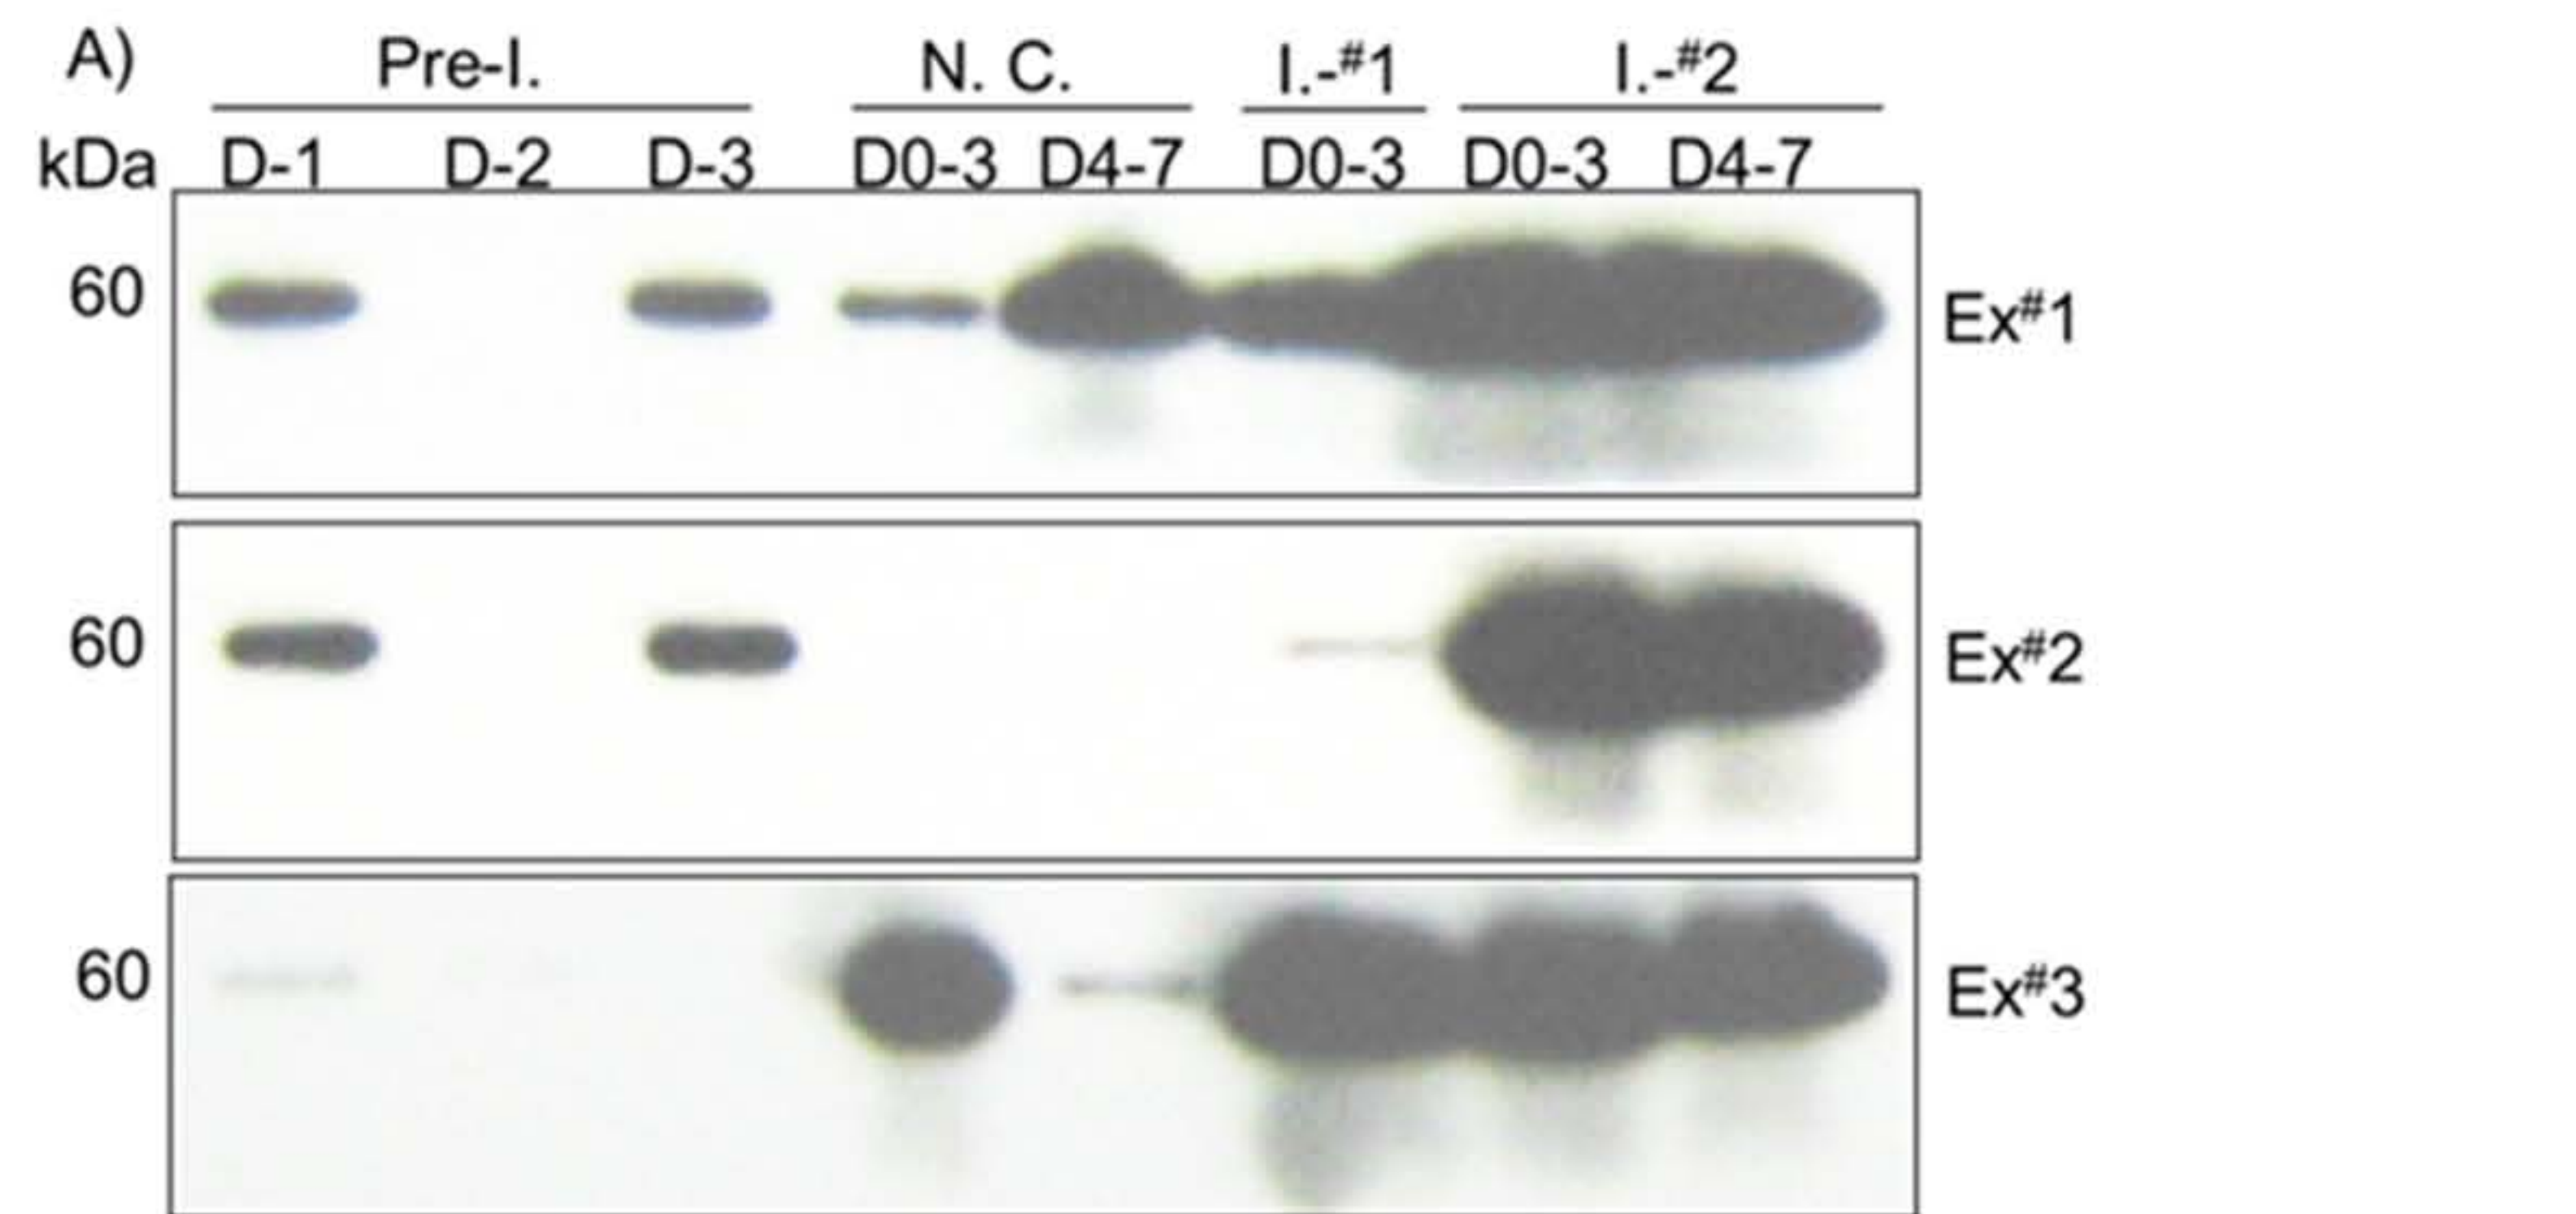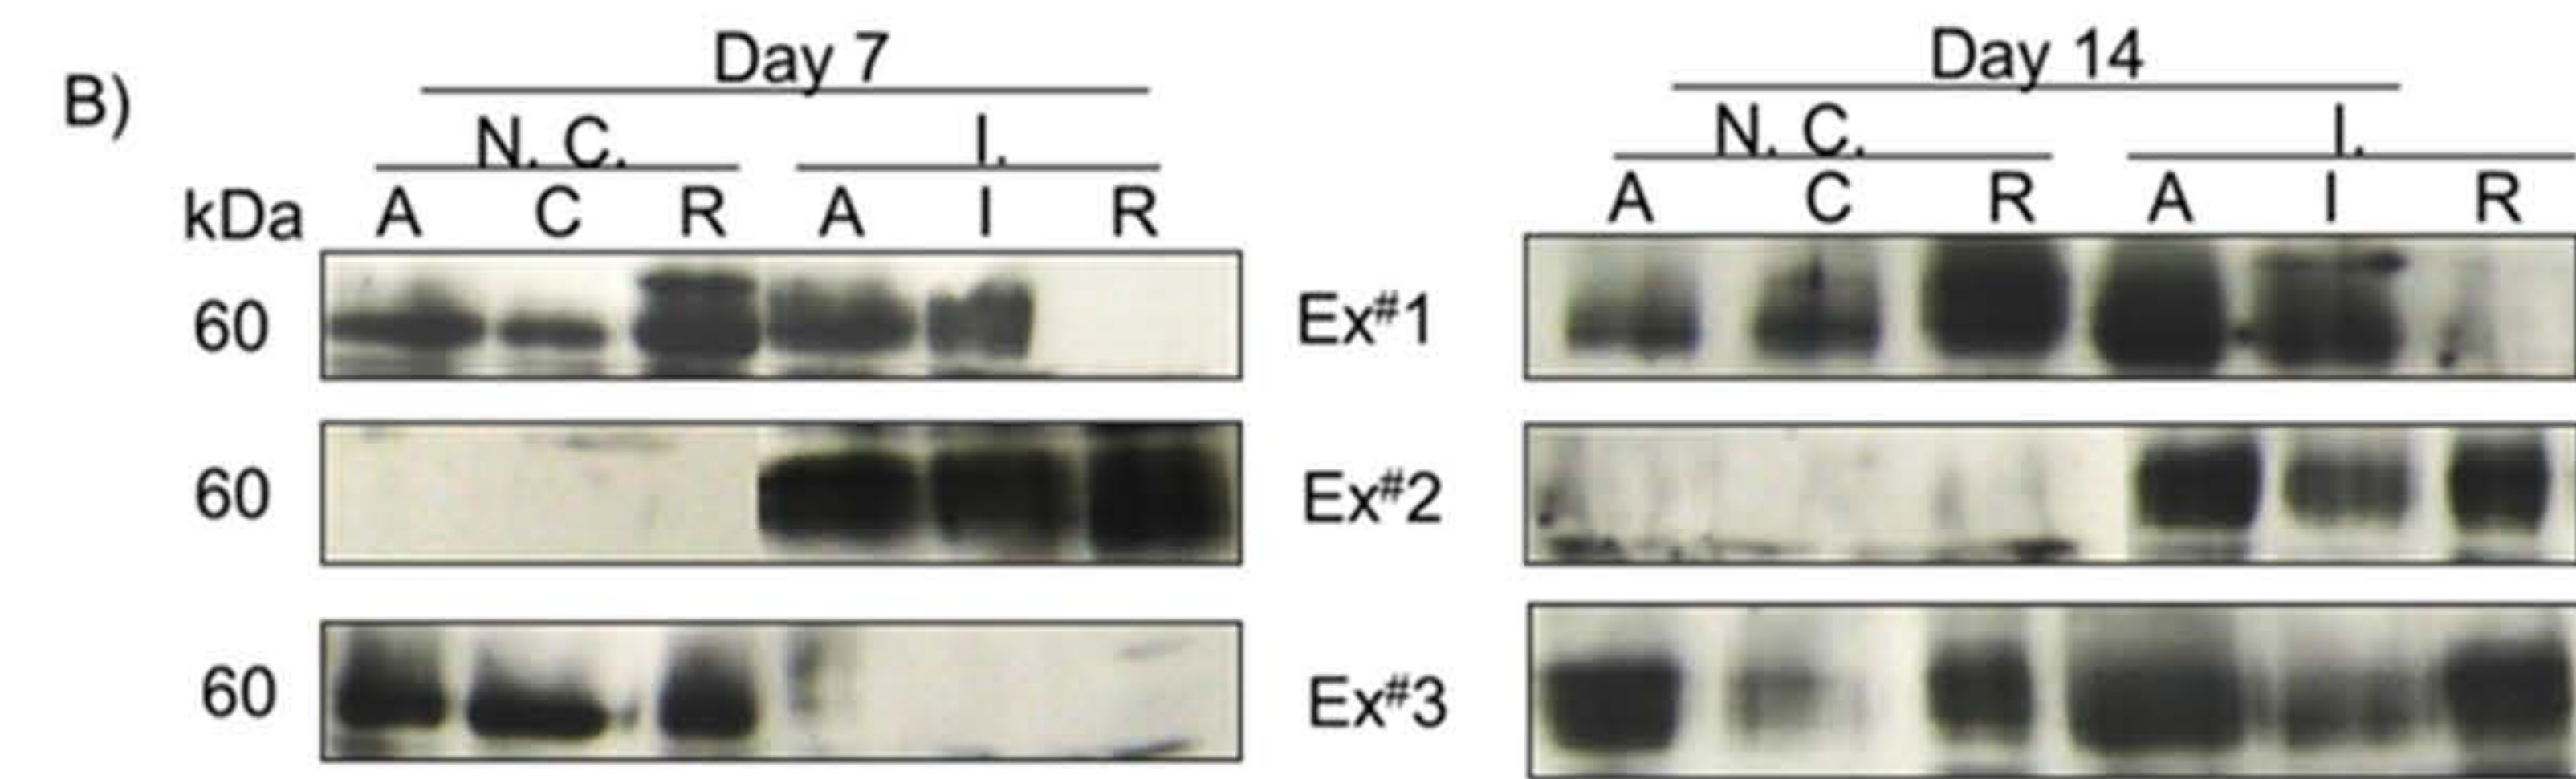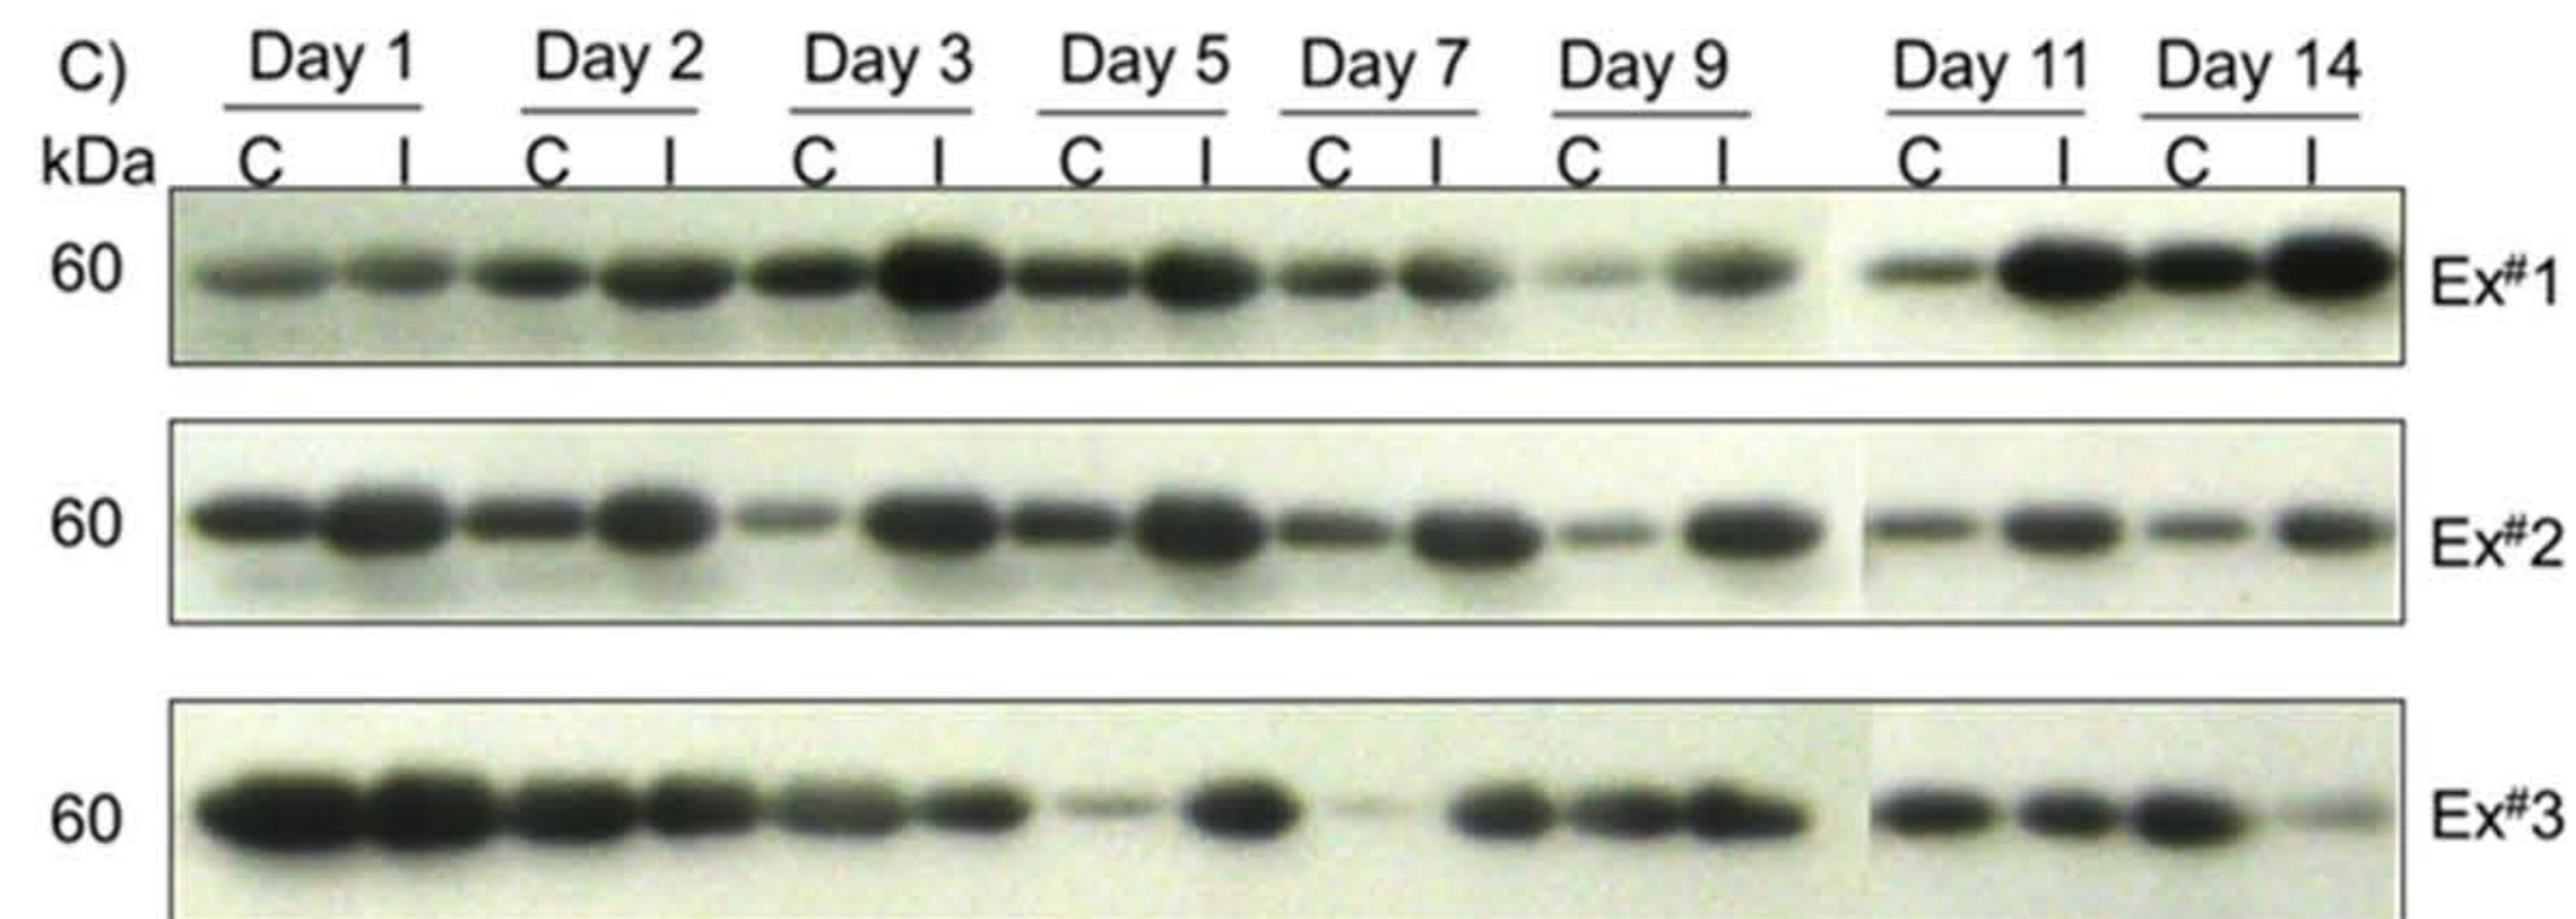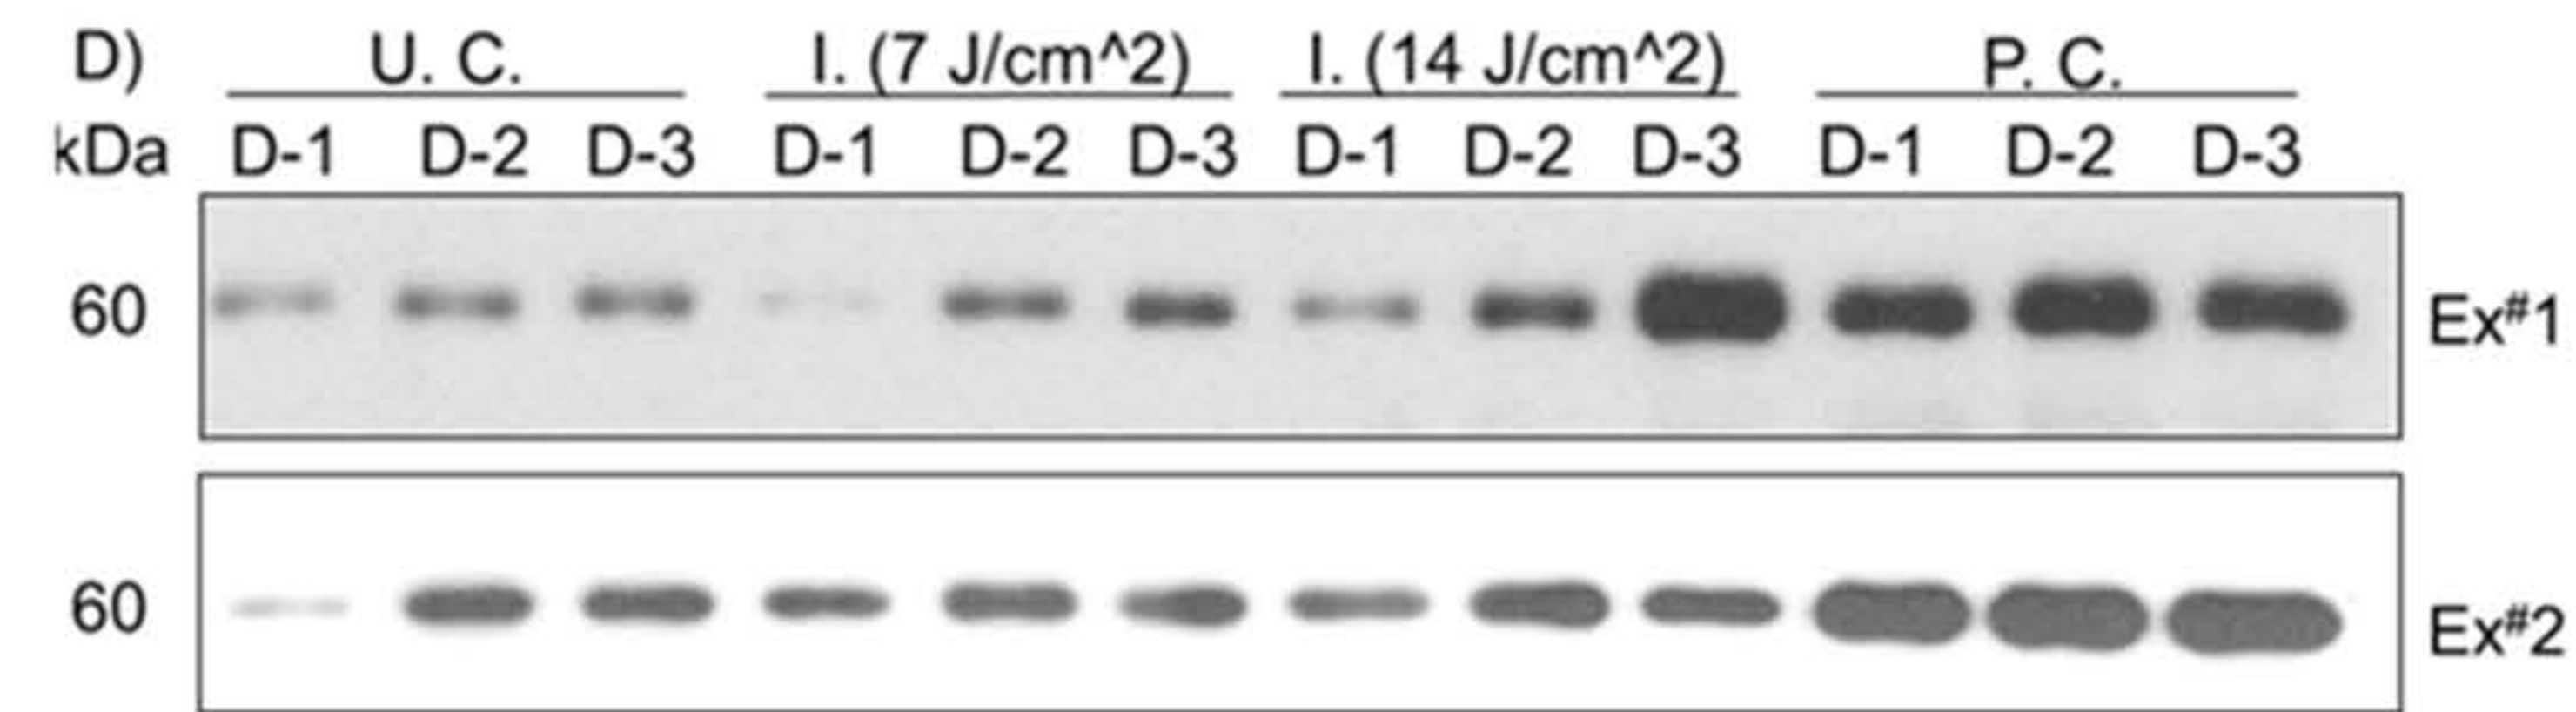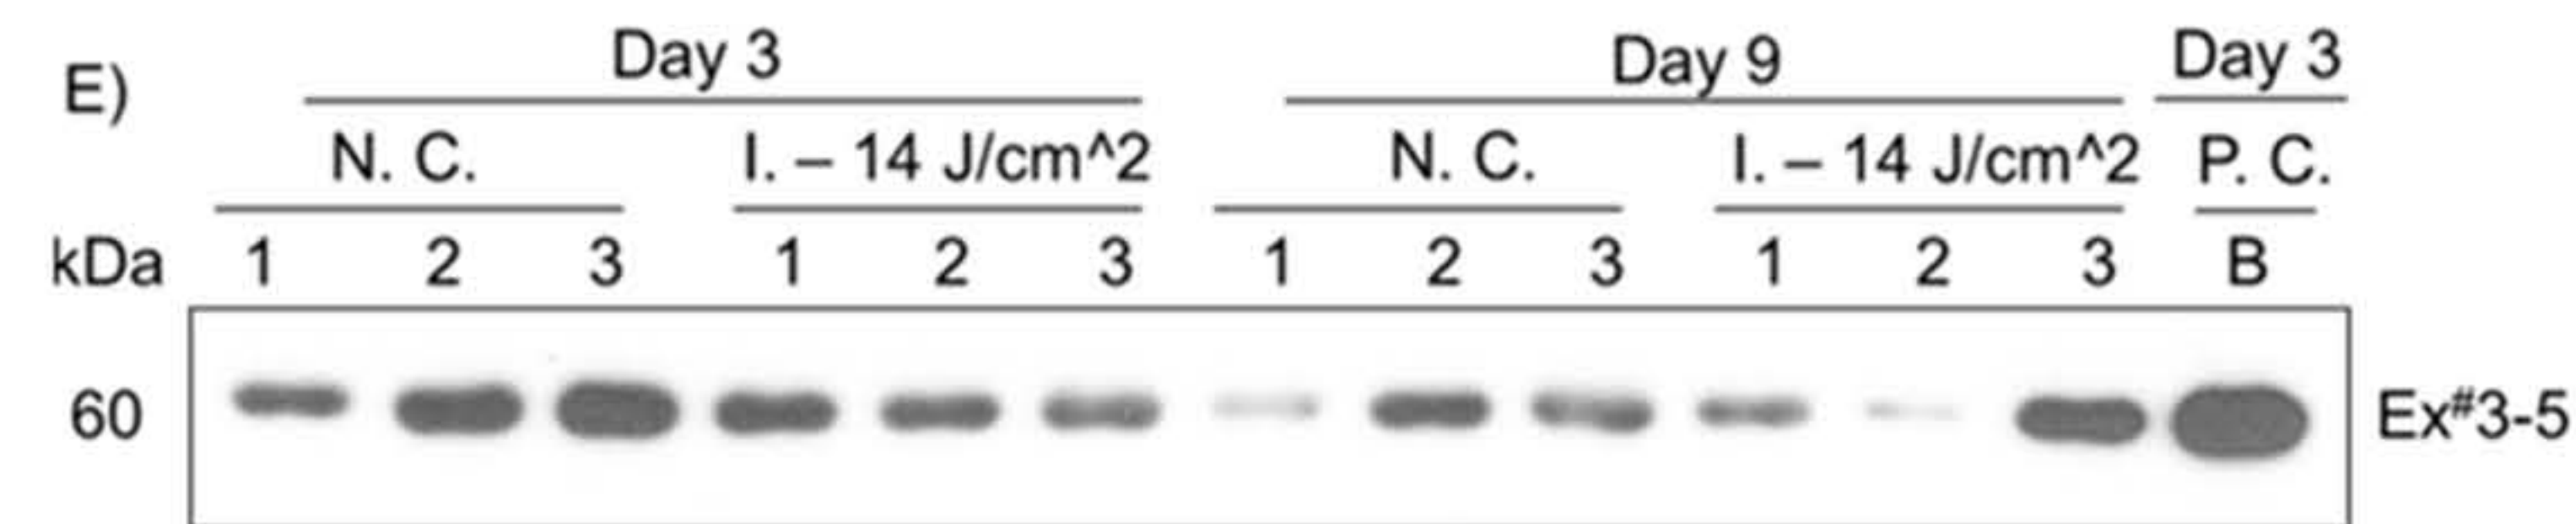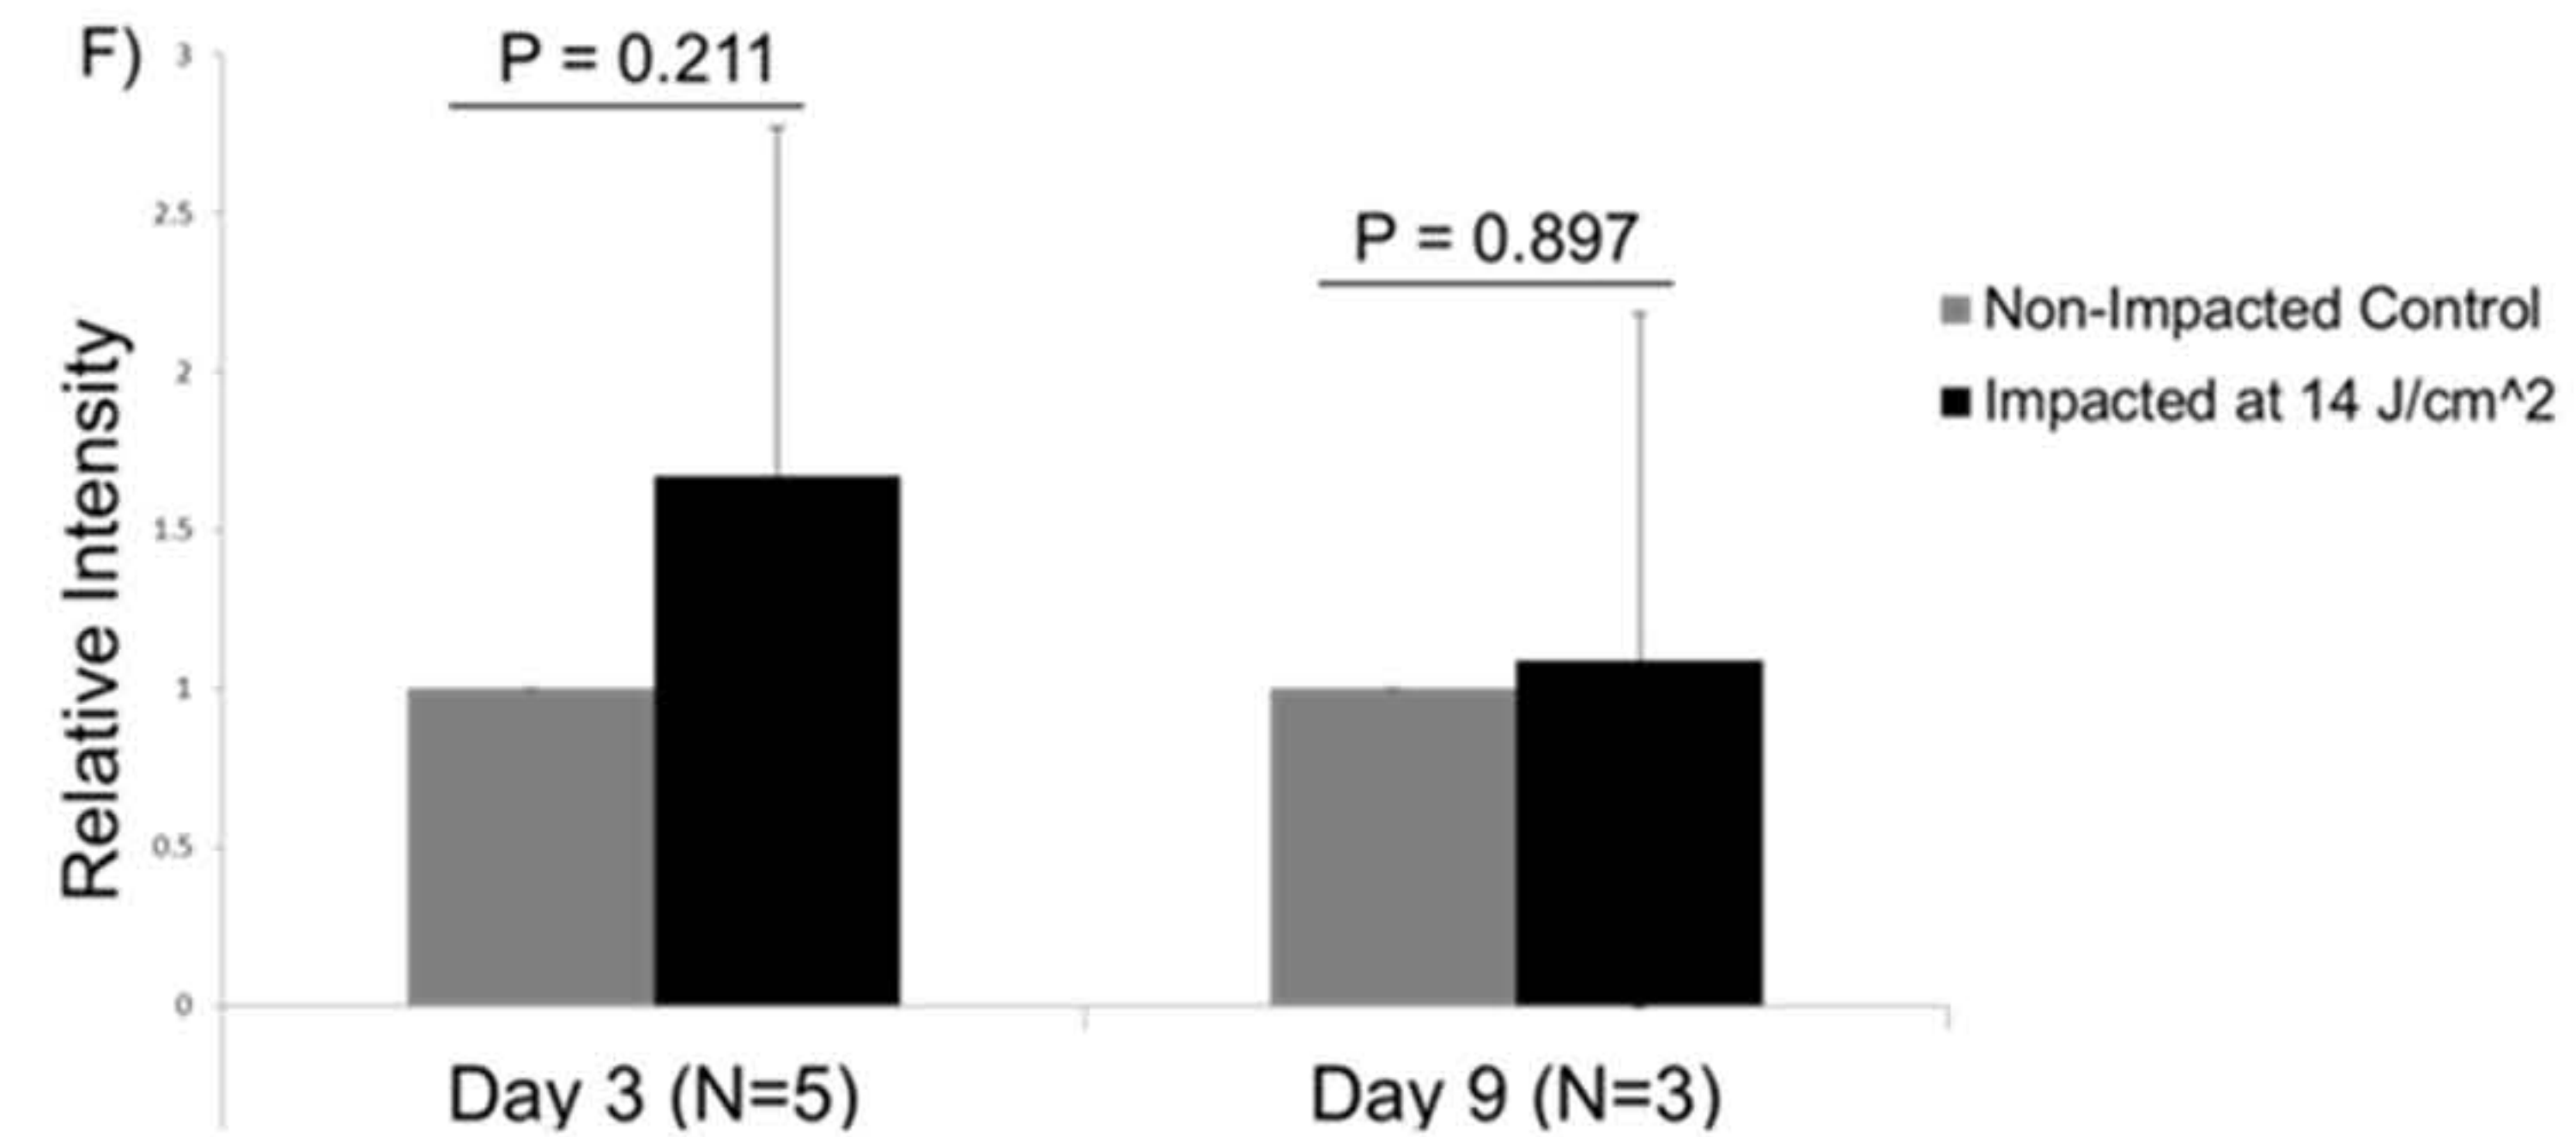



Supplementary Figure 4

MMP-1

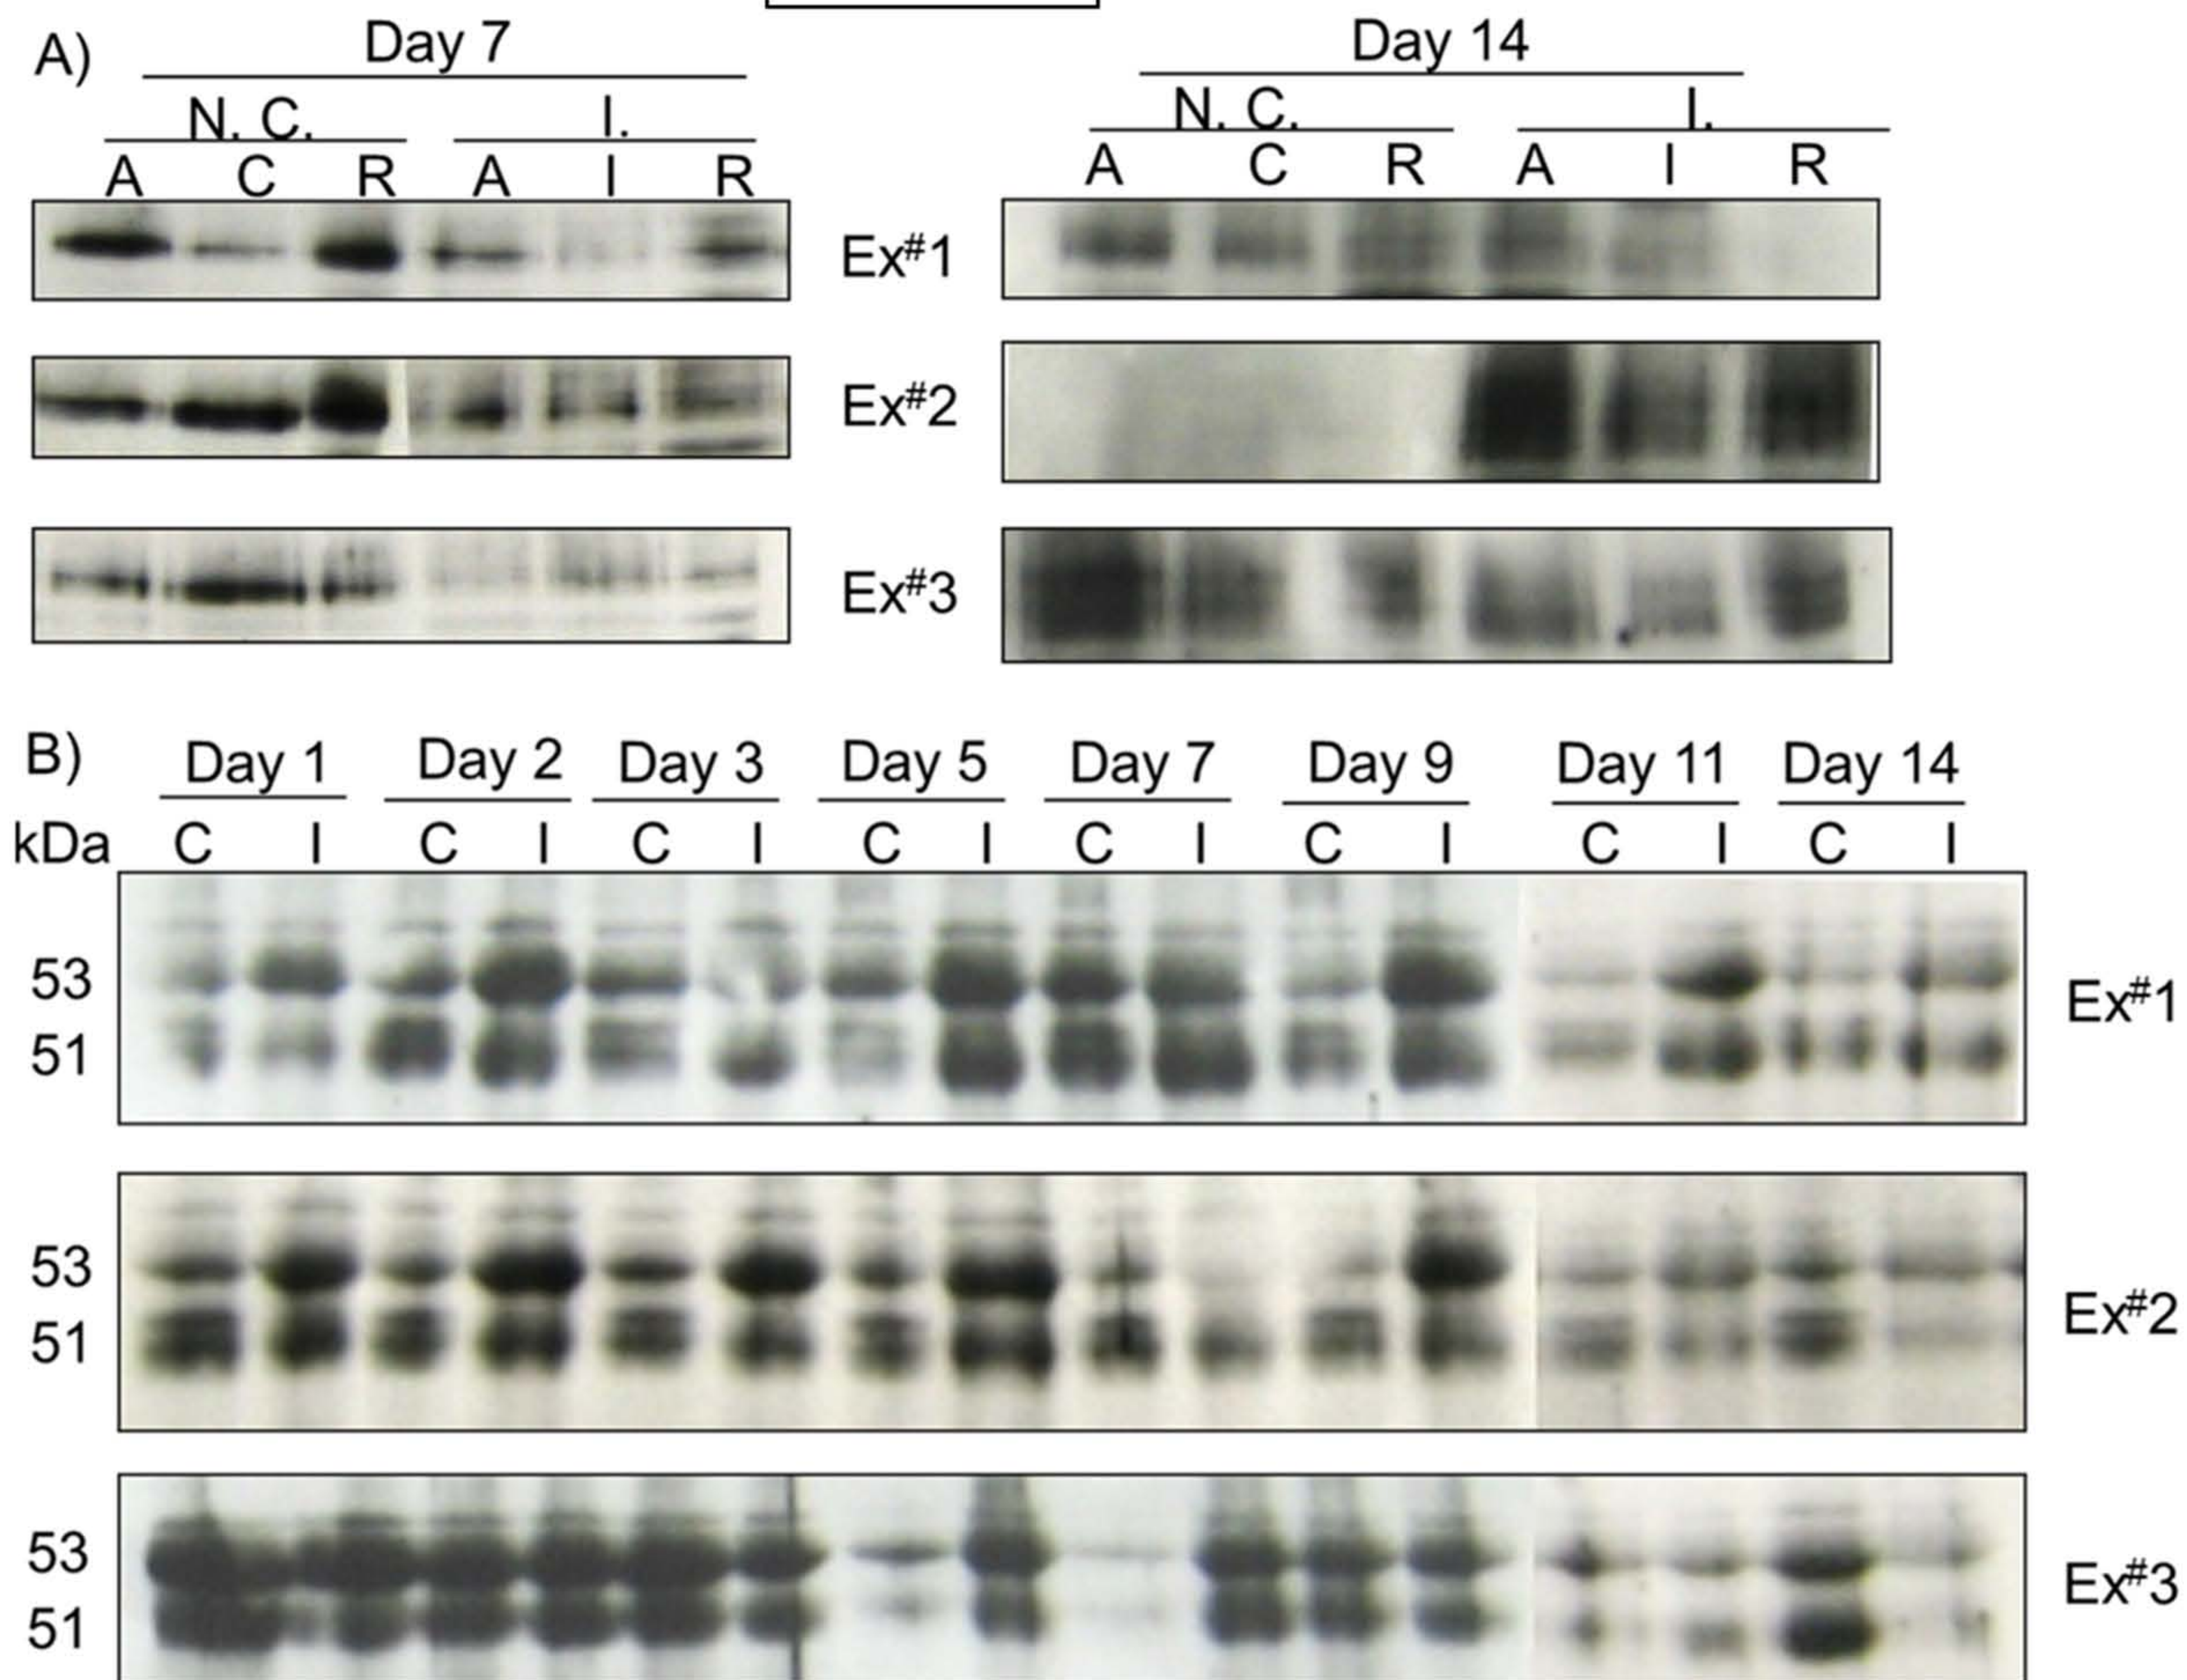



# Supplementary Figure 5

## ADAM-8

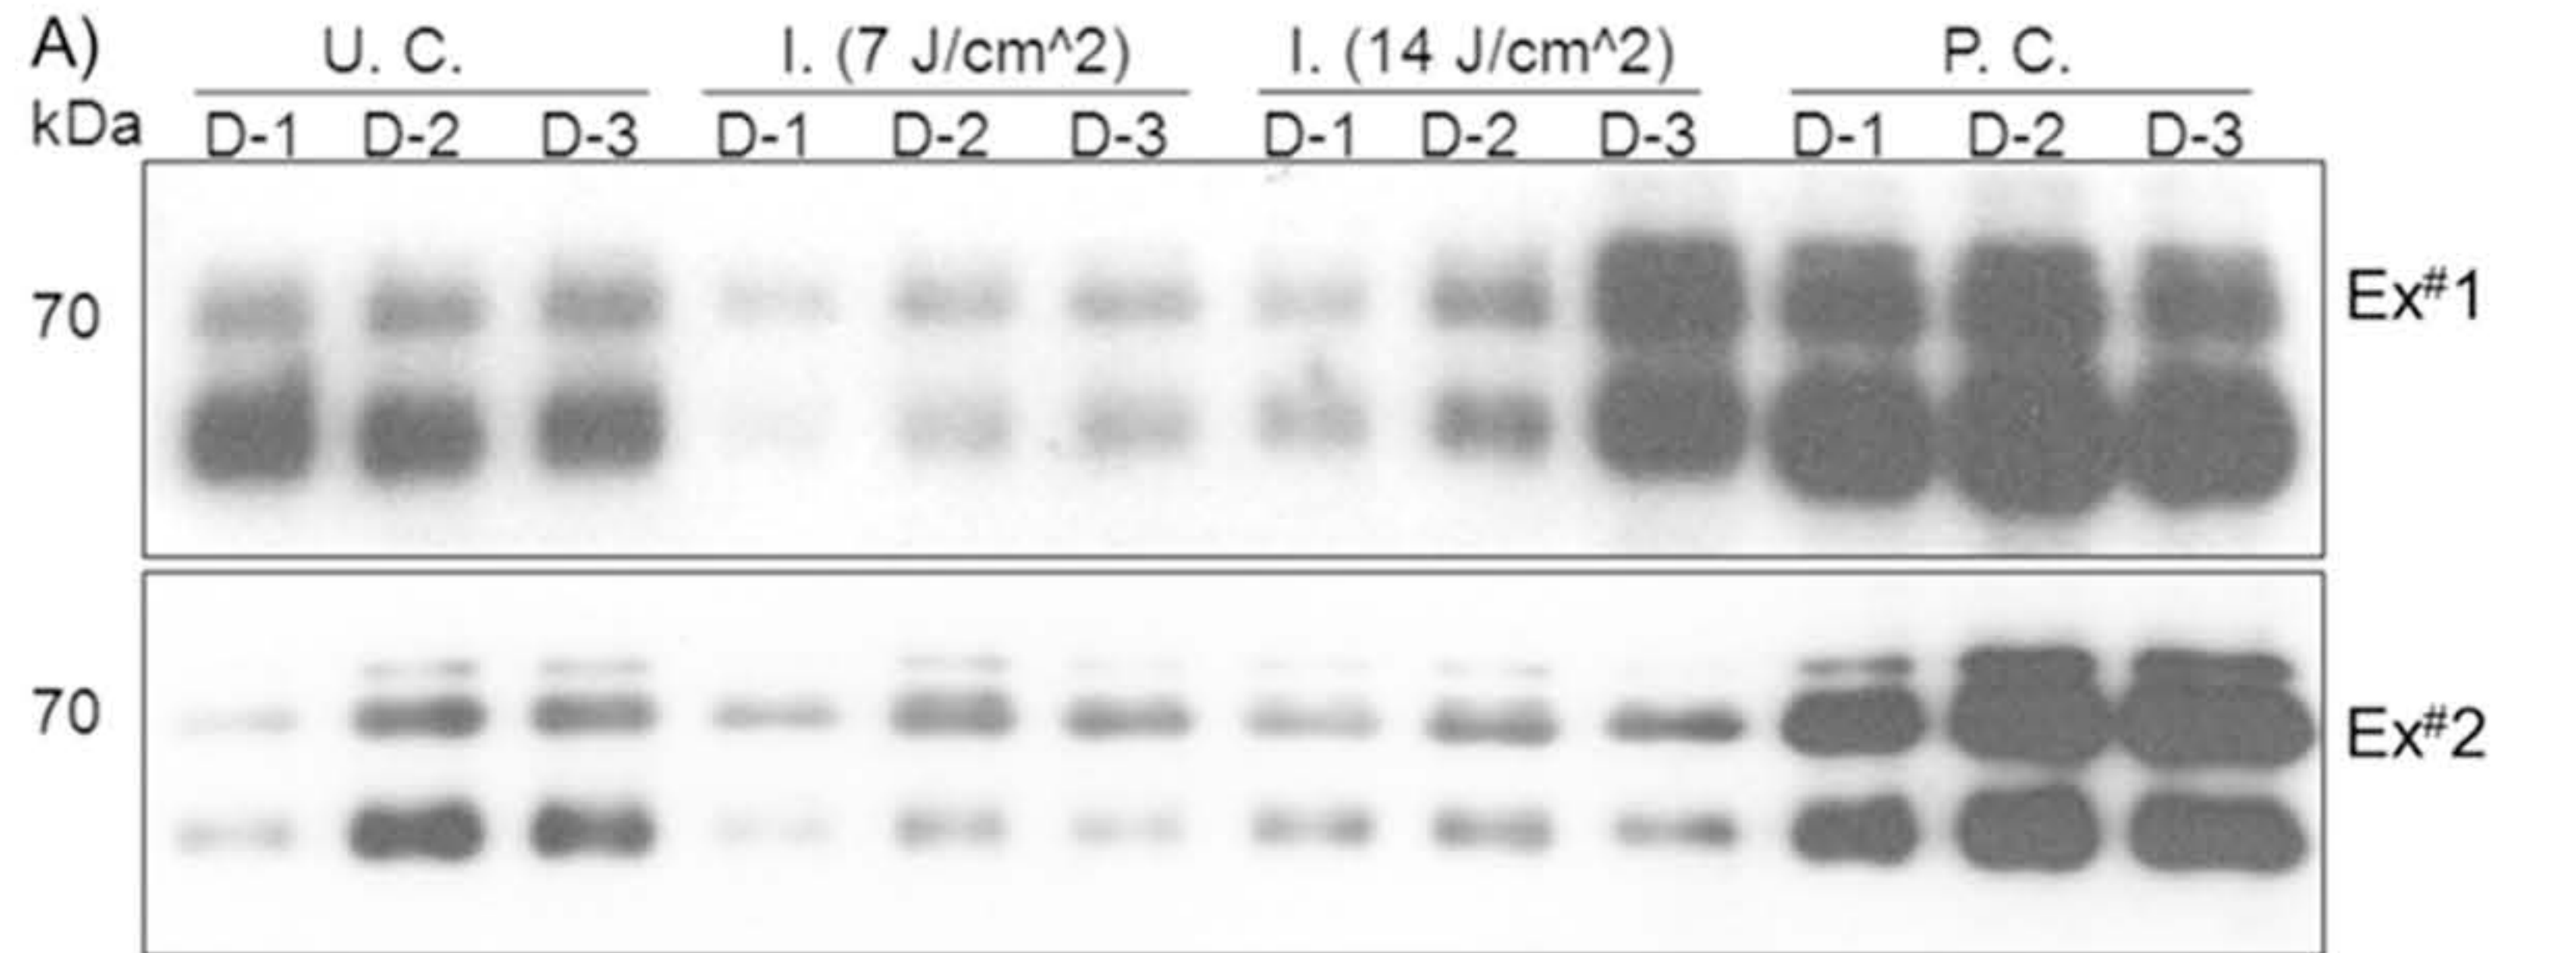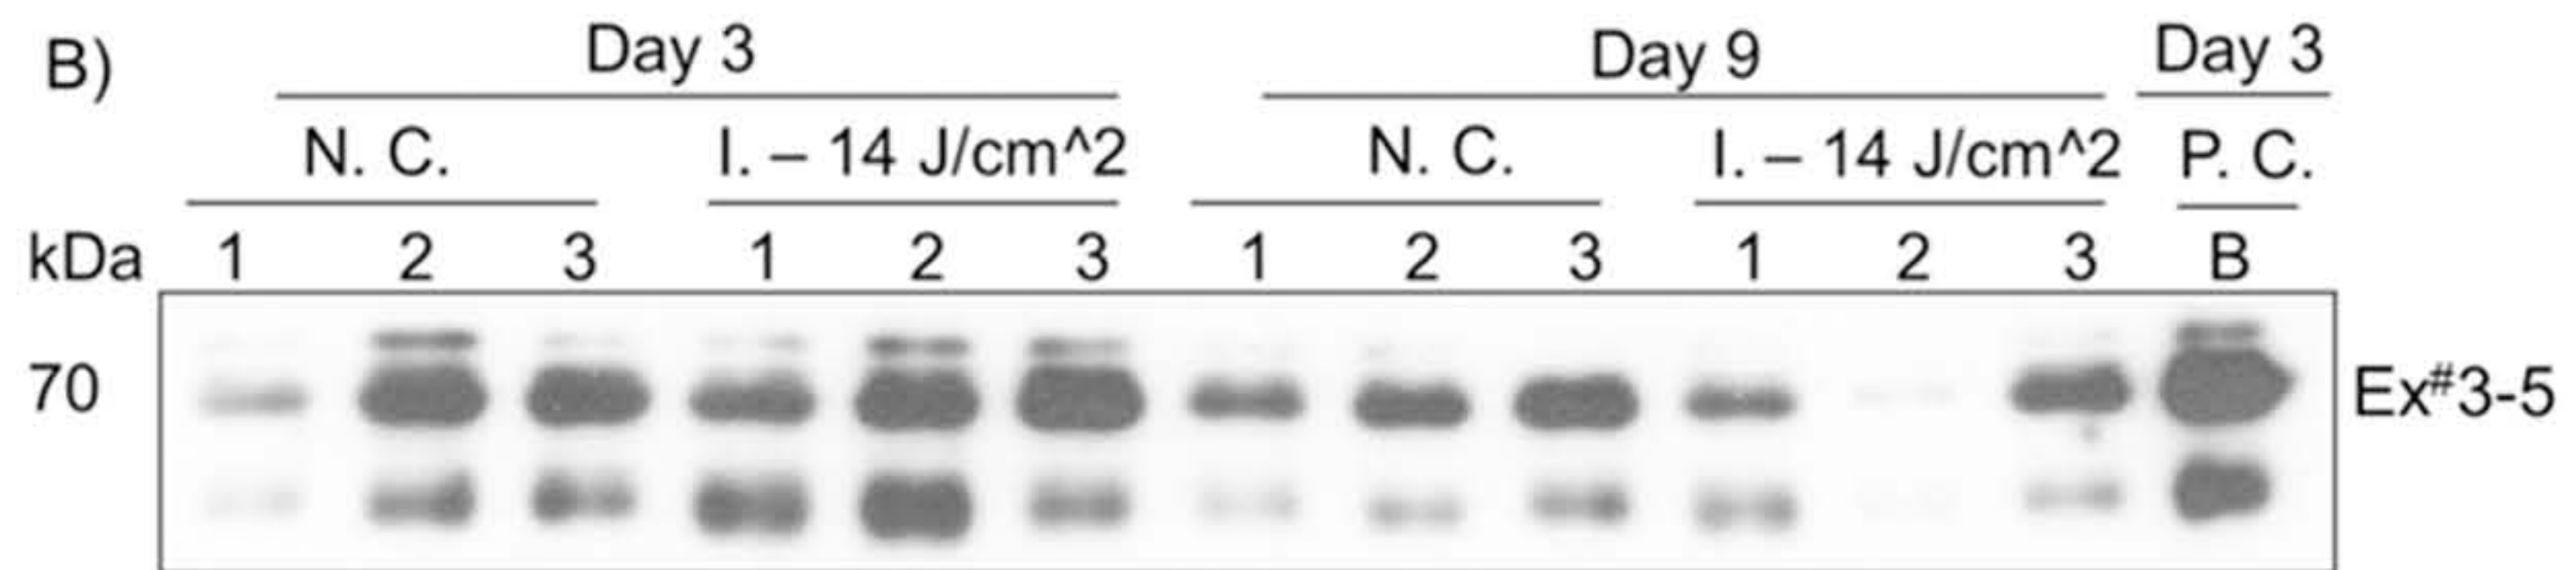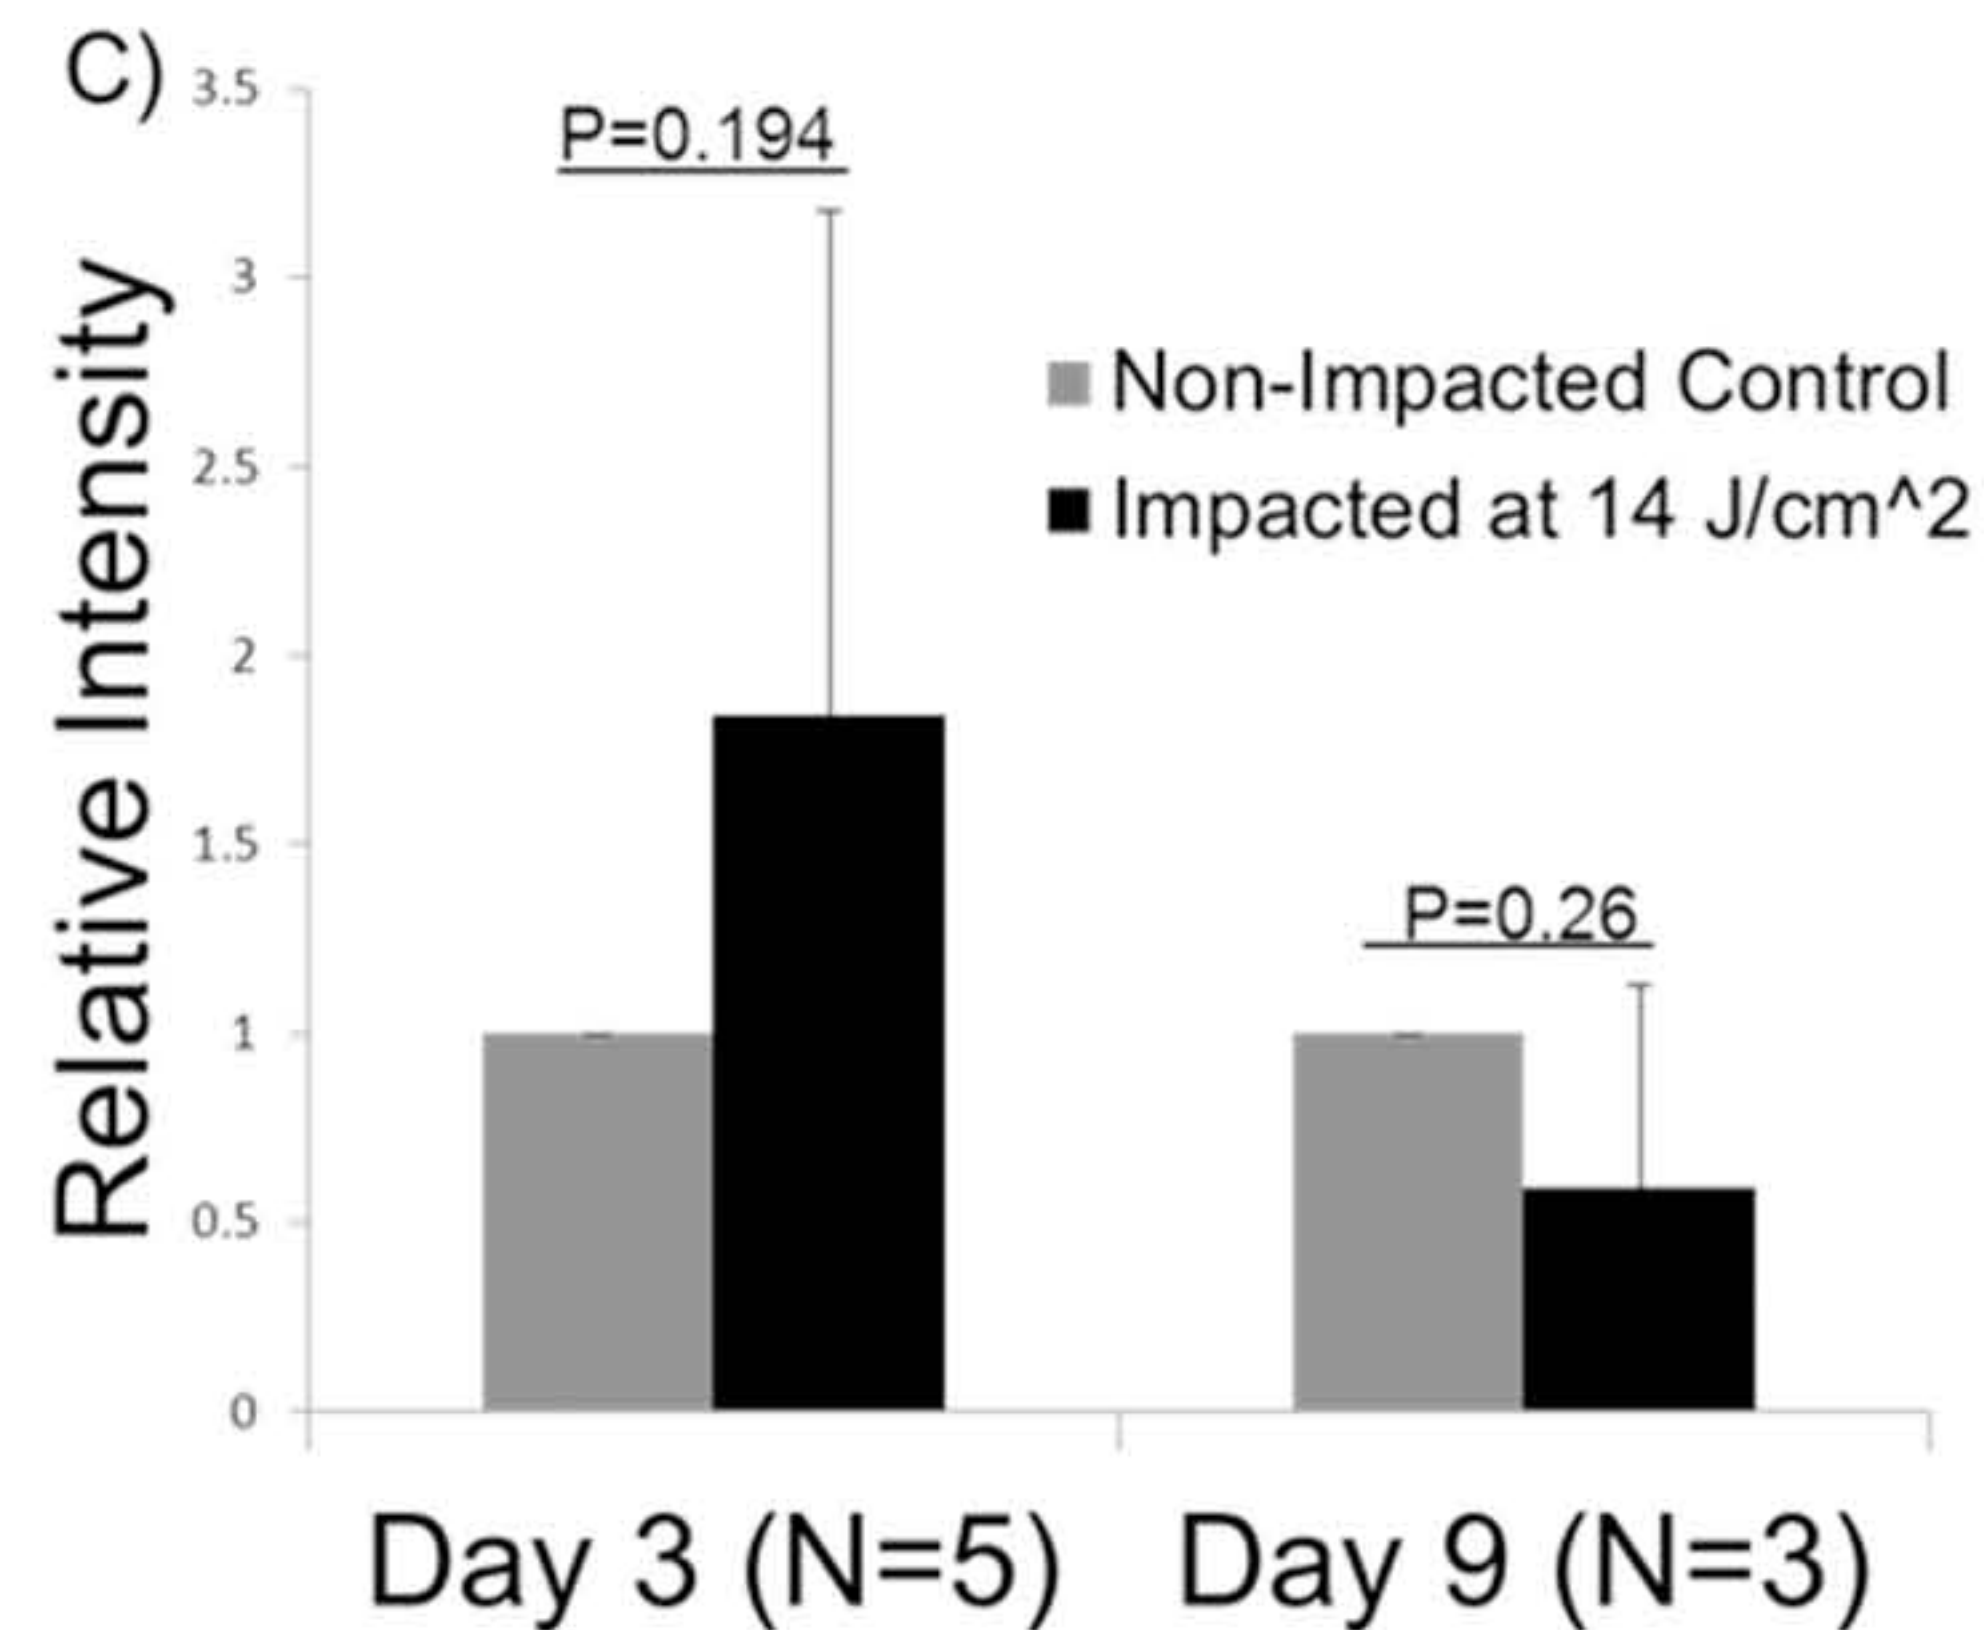

ADAMTS-5 by Conditioned Medium

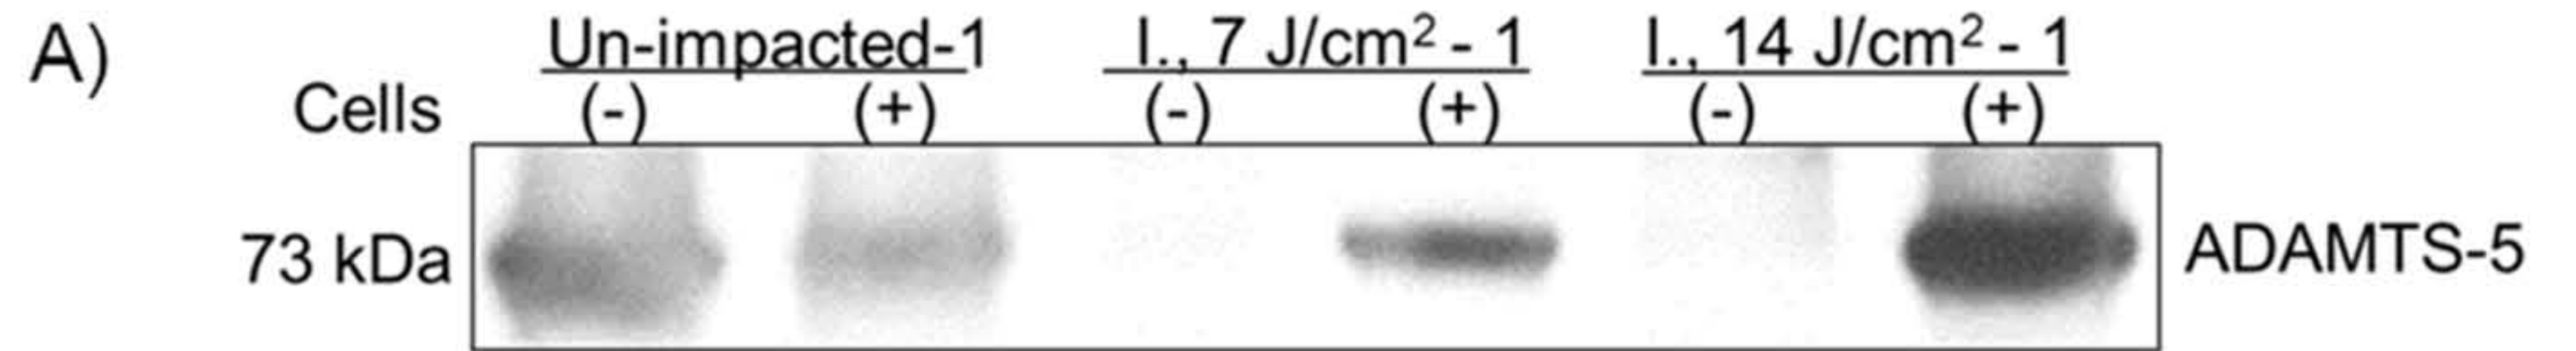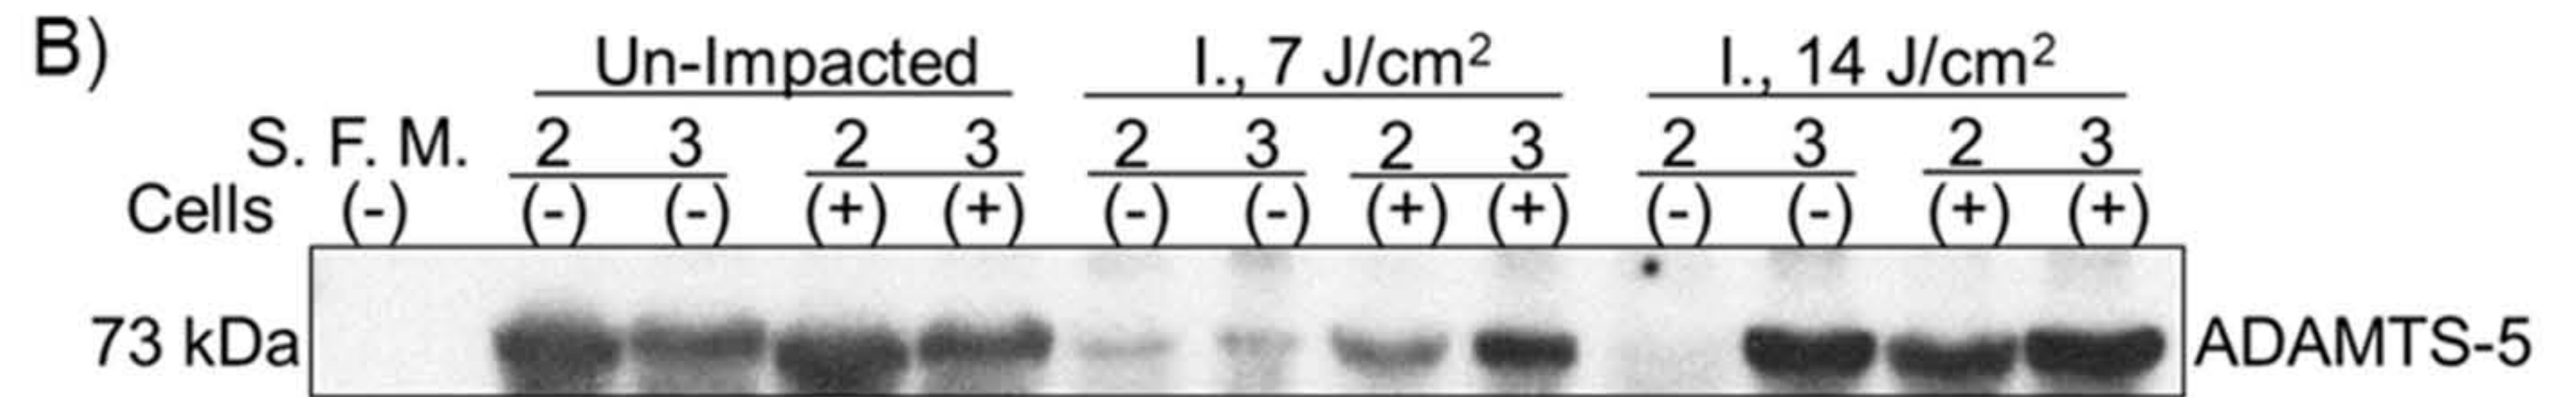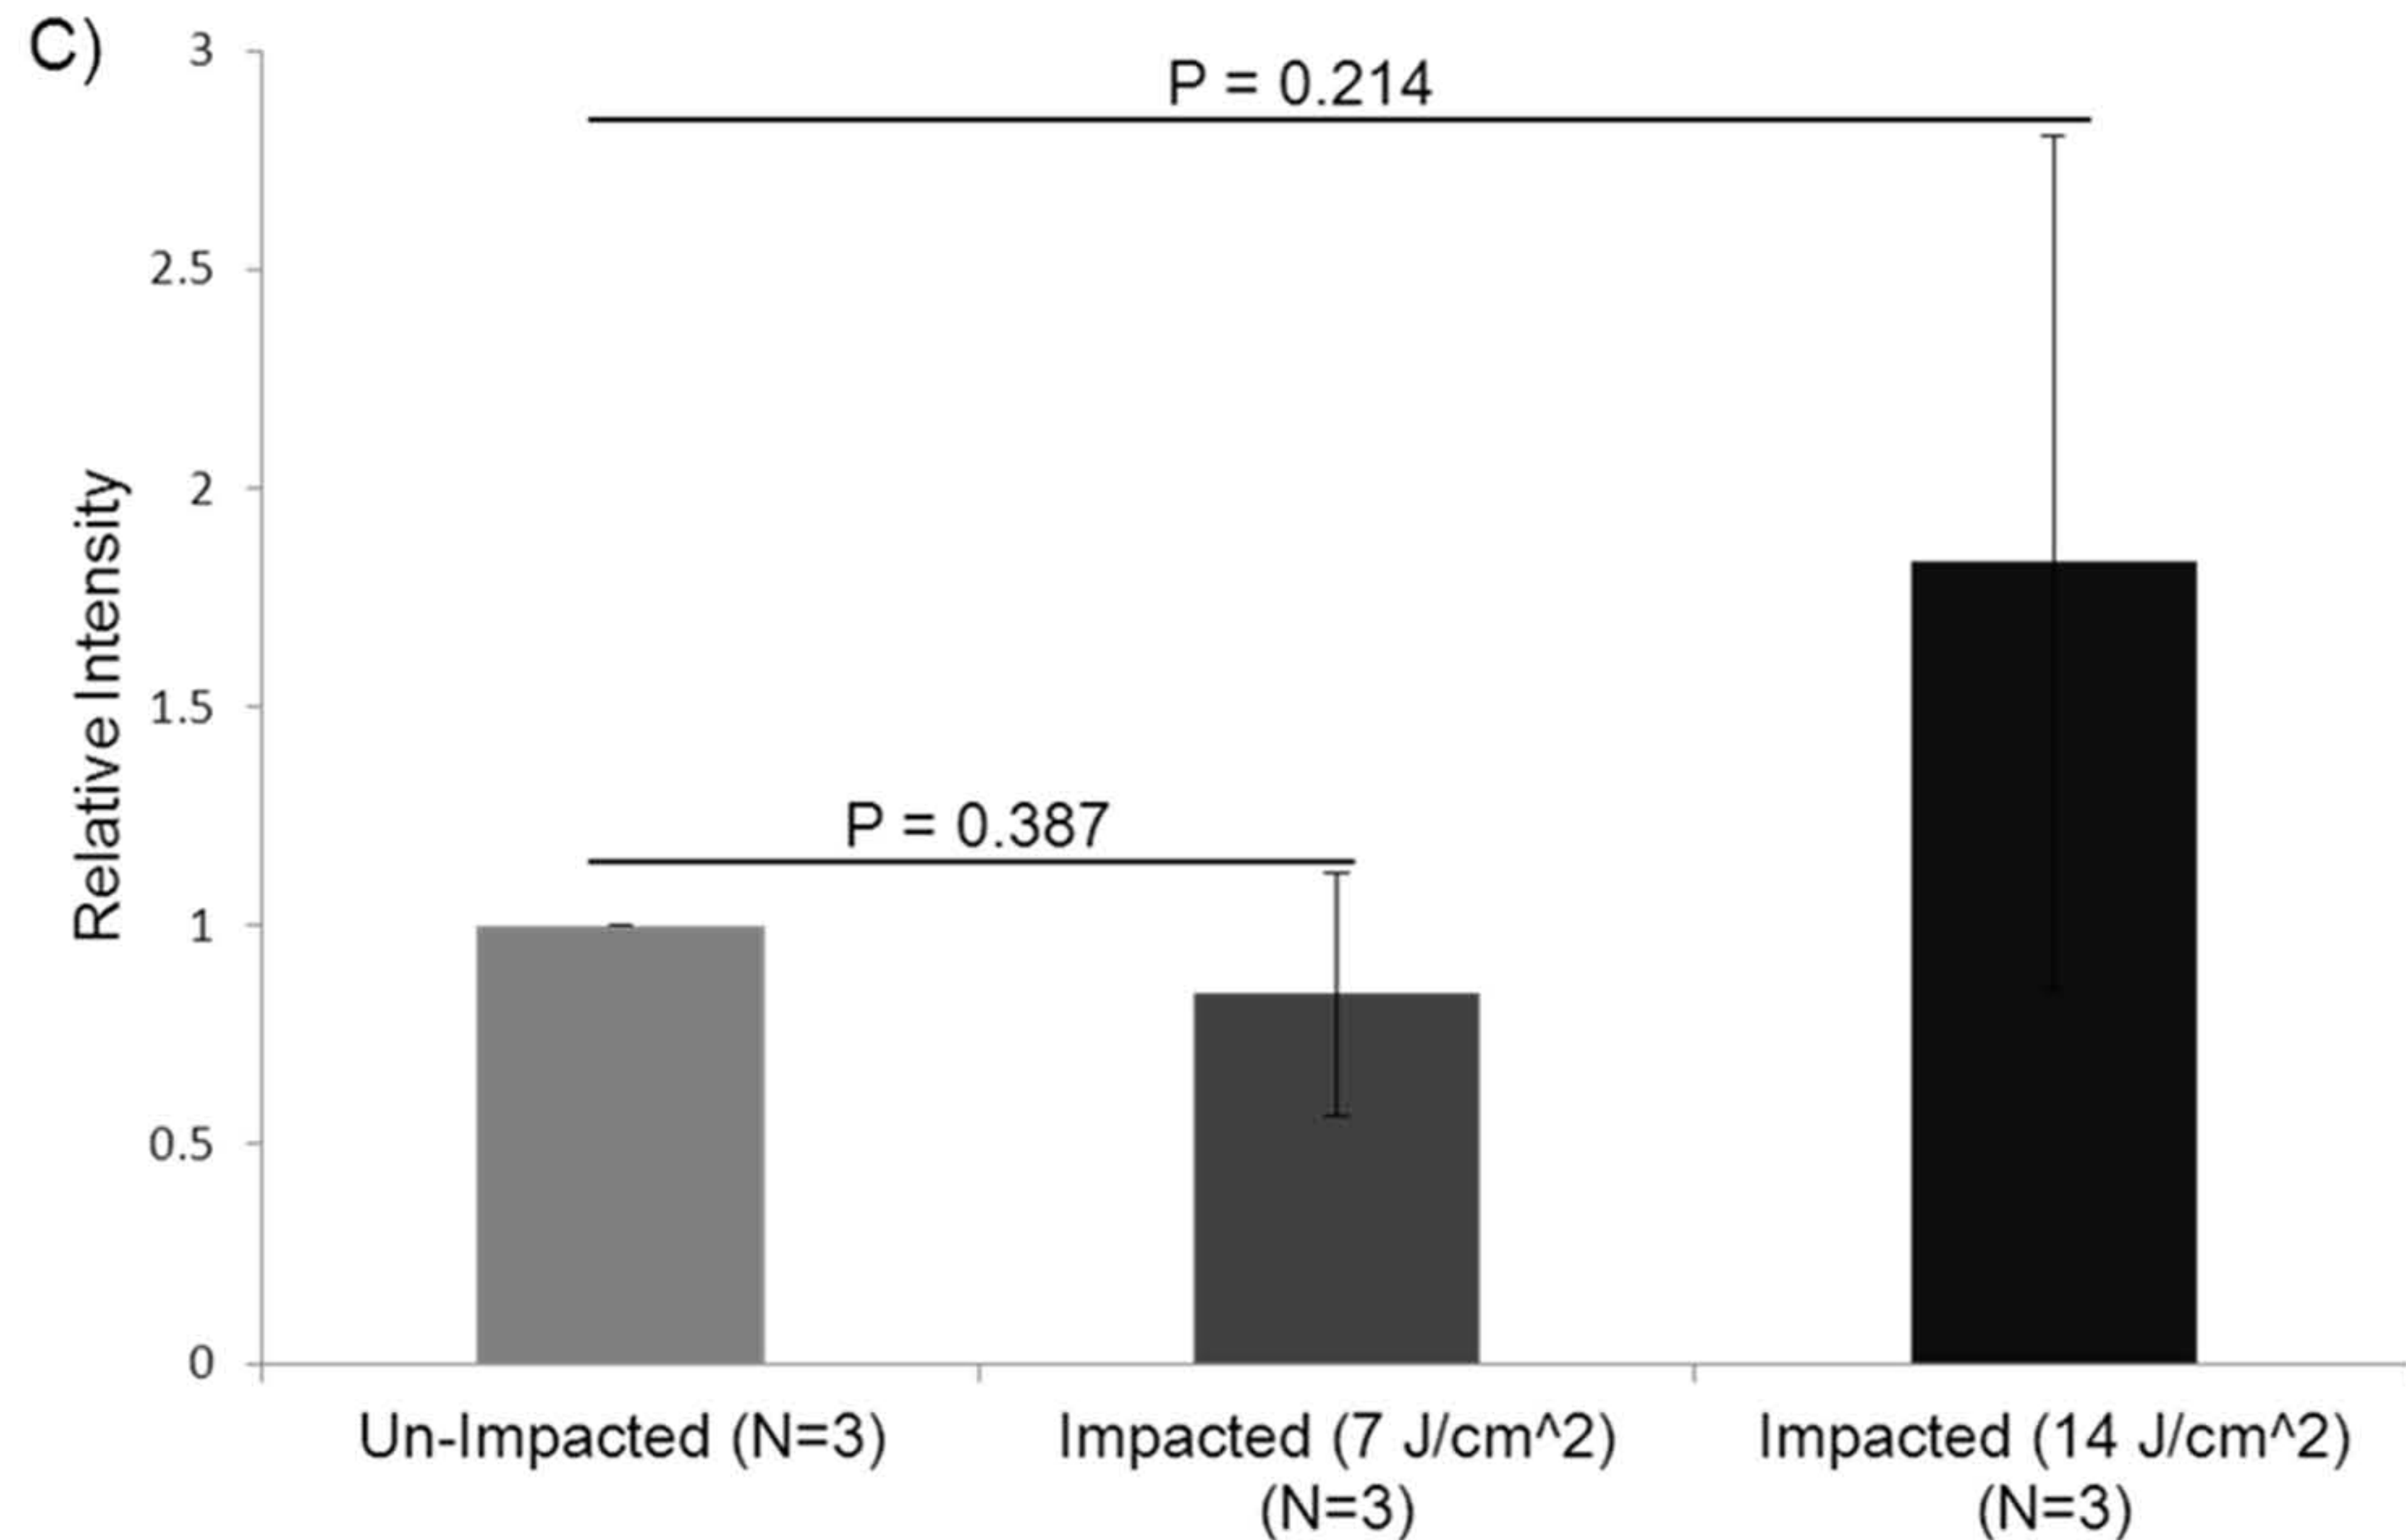

MMP-1 by Conditioned Medium

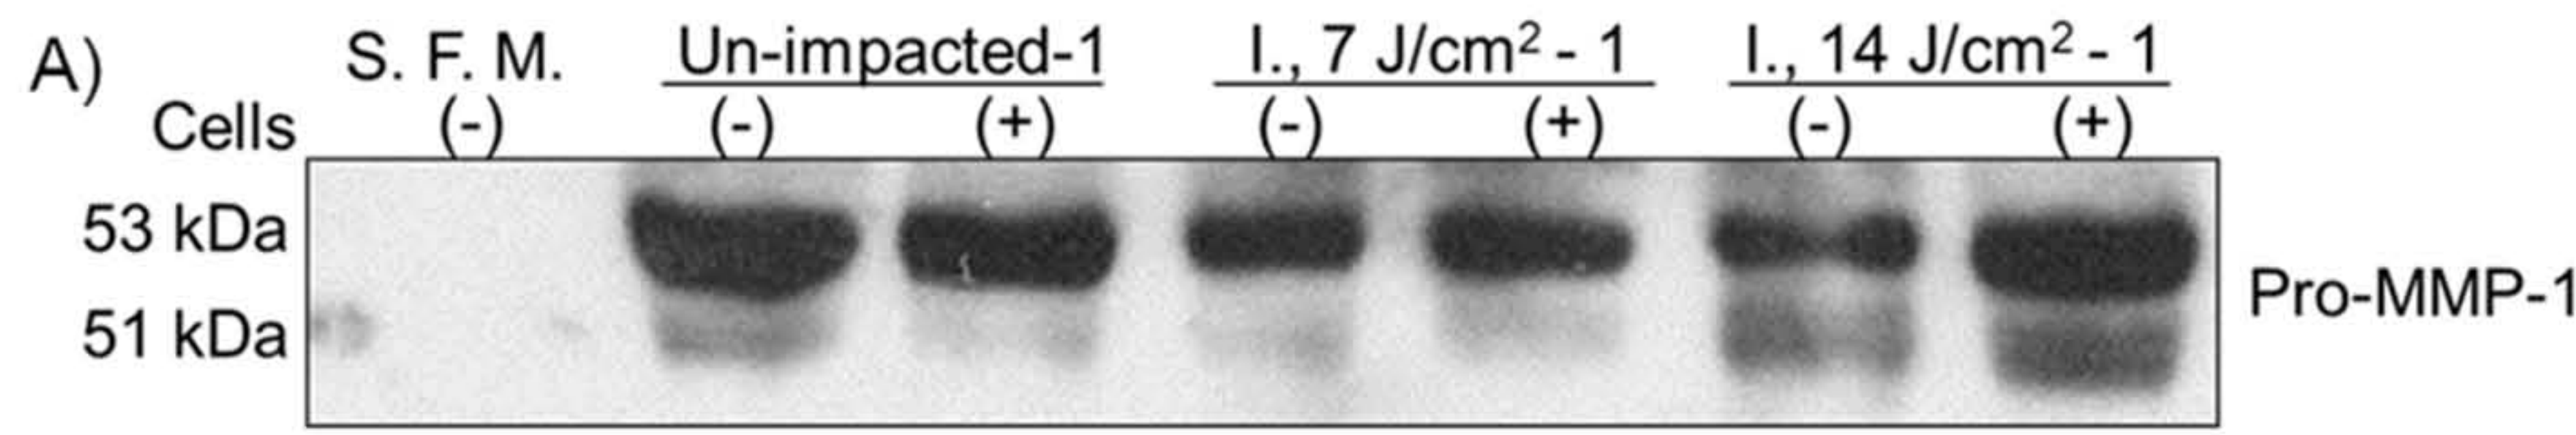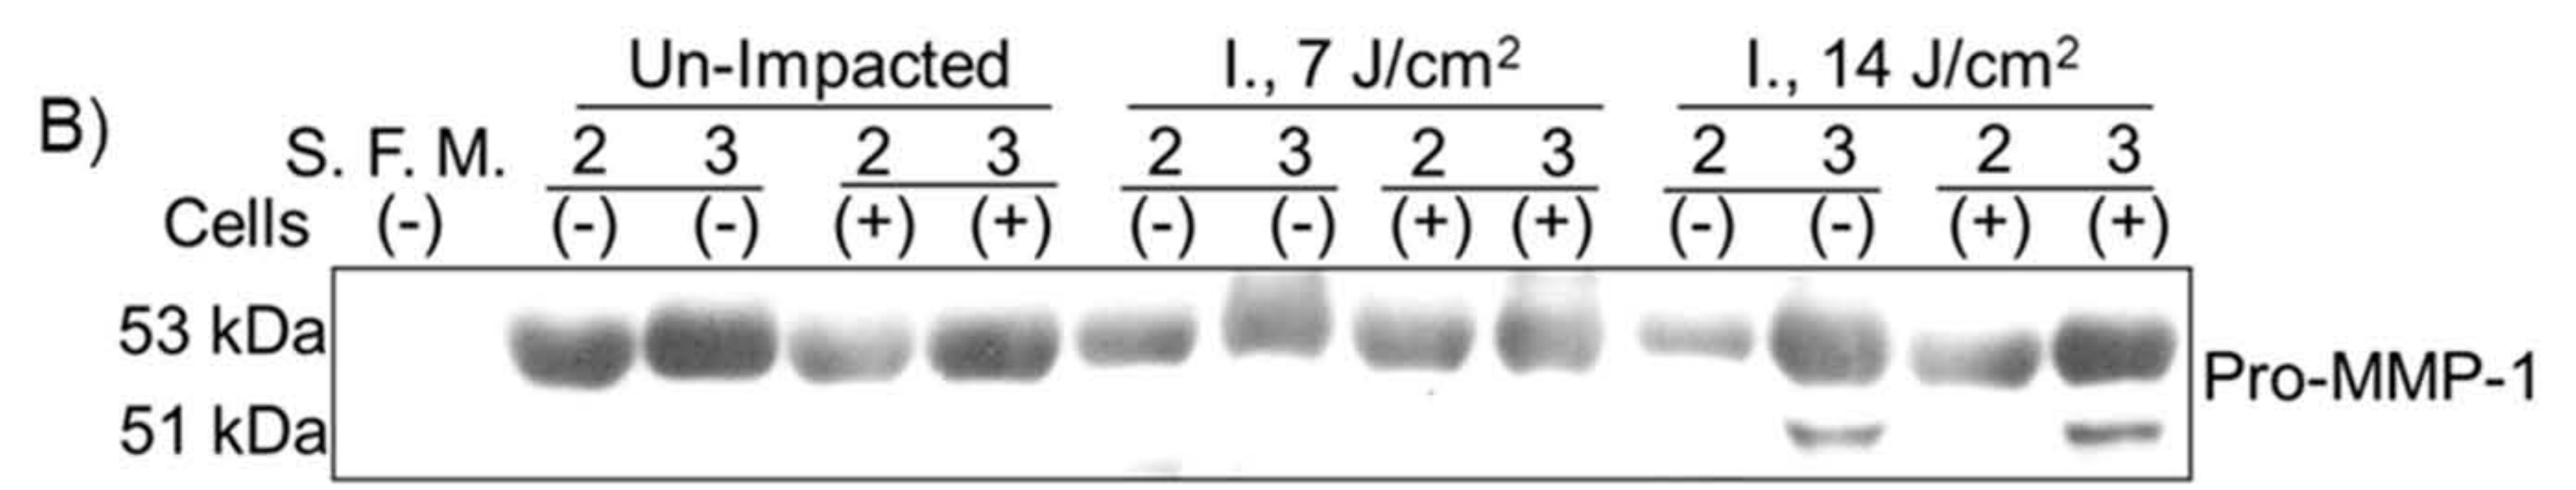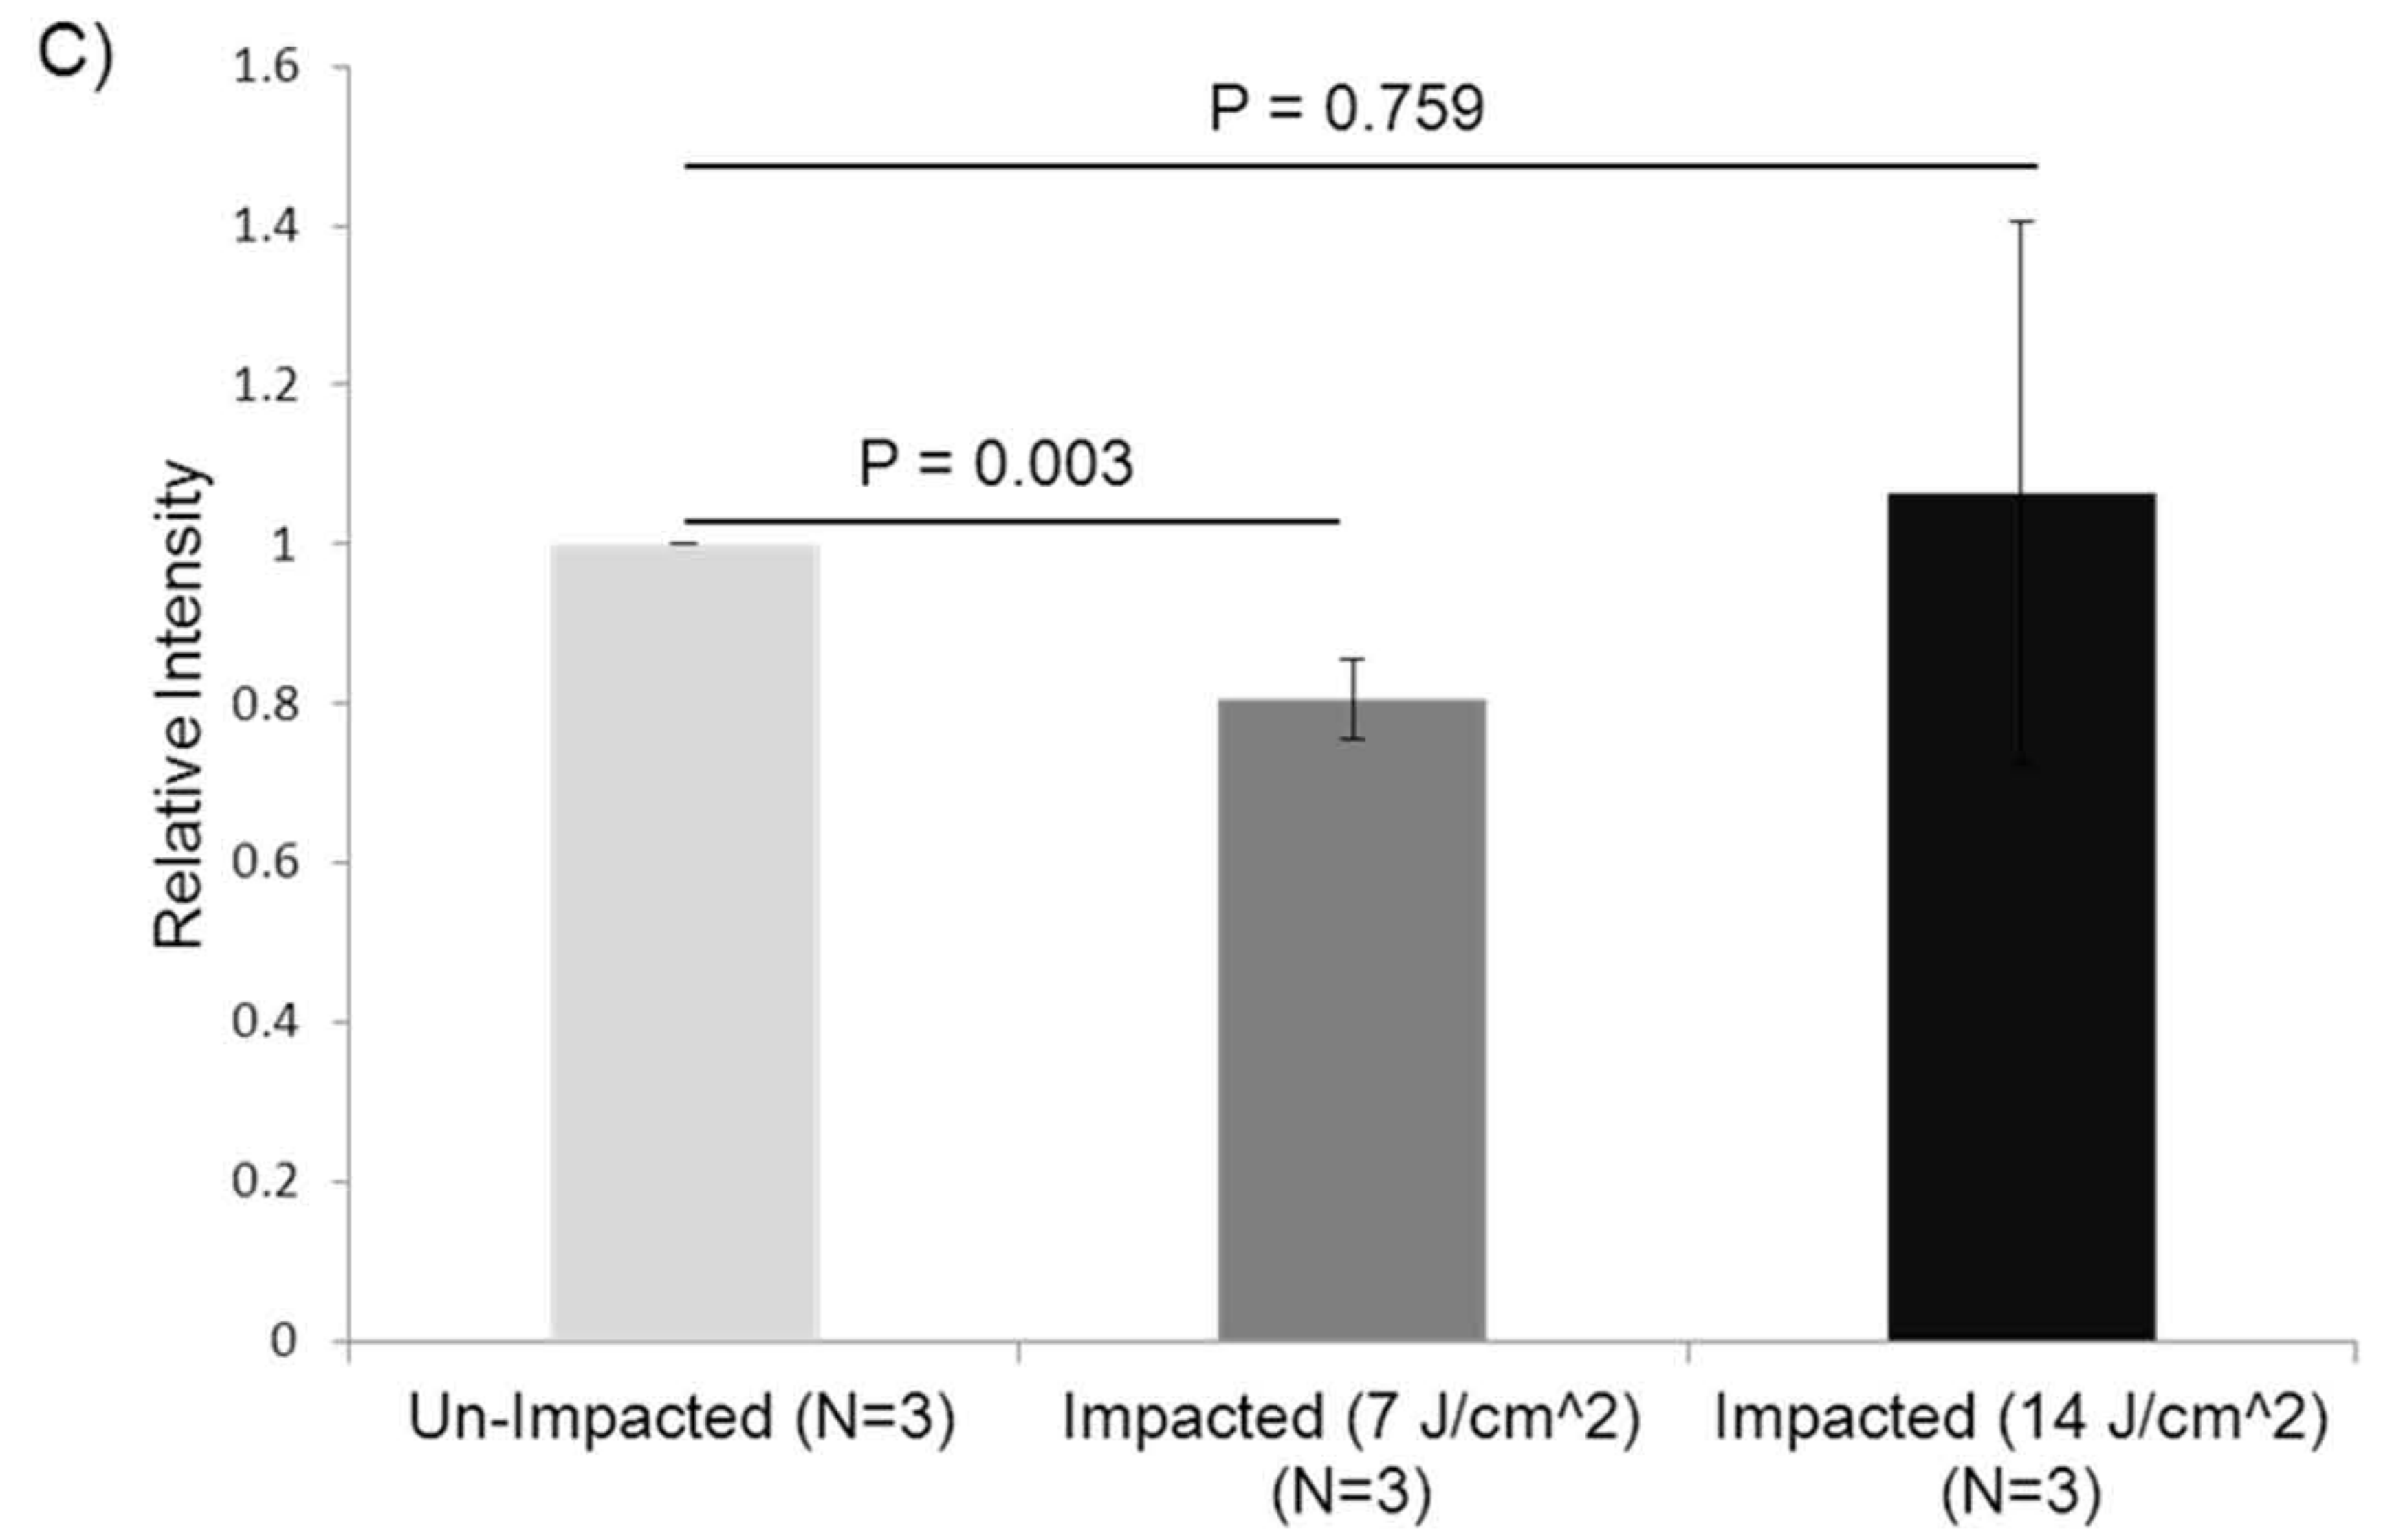



## Supplementary Figure 8

An Osteochondral Explant Impacted at 14 J/cm<sup>2</sup> (I.)

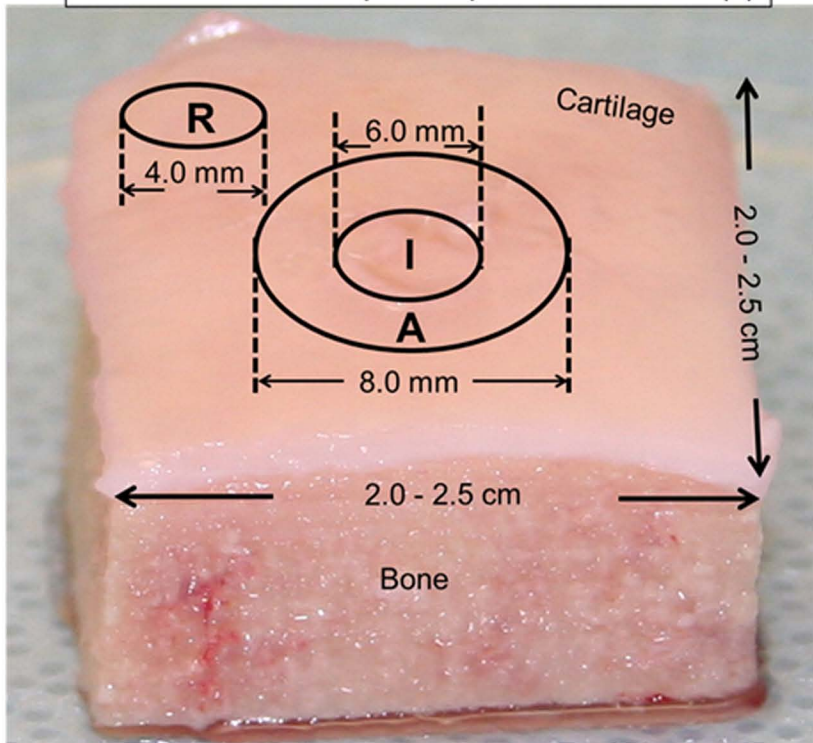

A Non-Impacted Control Osteochondral Explant (N. C.)

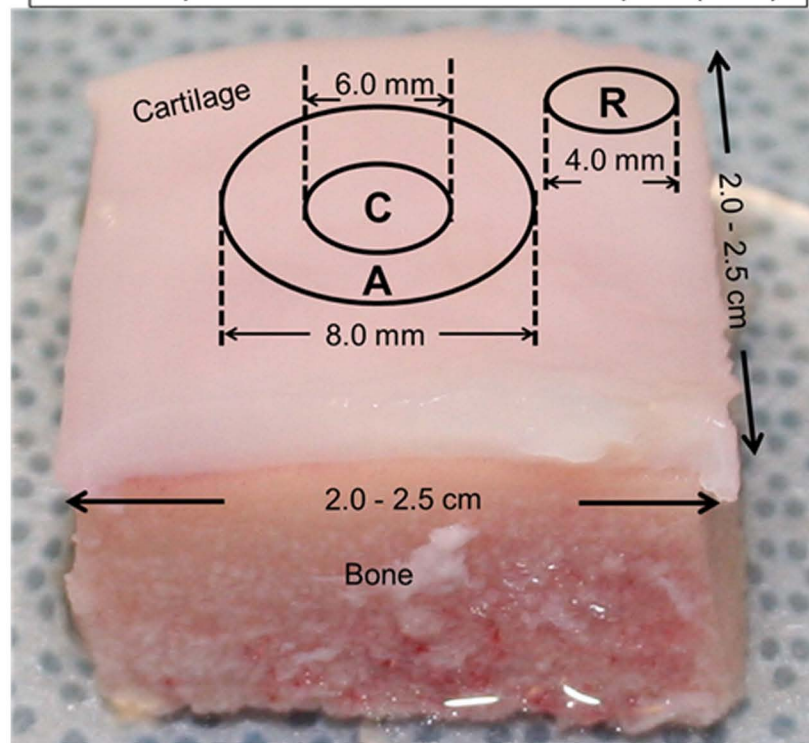

Full-thickness zonal cartilage was sampled with 4.0-mm, 6.0-mm, and 8.0-mm biopsy punches. I = Impact zone/site; C = Center; A = Annulus; R = Remote area/site.
